# 1 Exome-wide assessment of the functional impact and 2 pathogenicity of multi-nucleotide mutations

3

4 Joanna Kaplanis<sup>1</sup>, Nadia Akawi<sup>5</sup>, Giuseppe Gallone<sup>1</sup>, Jeremy F. McRae<sup>1</sup>, Elena  
5 Prigmore<sup>1</sup>, Caroline F. Wright<sup>2</sup>, David R. Fitzpatrick<sup>3</sup>, Helen V. Firth<sup>1,4</sup>, Jeffrey C.  
6 Barrett<sup>1</sup>, Matthew E. Hurles<sup>1\*</sup> on behalf of the Deciphering Developmental Disorders  
7 study

8

9 Affiliation

- 10 1. Wellcome Sanger Institute, Wellcome Genome Campus, Hinxton, UK  
11 2. Institute of Biomedical and Clinical Science, University of Exeter Medical  
12 School, RILD Level 4, Royal Devon & Exeter Hospital, Barrack Road, Exeter,  
13 EX2 5DW, UK  
14 3. MRC Human Genetics Unit, MRC IGMM, University of Edinburgh, Western  
15 General Hospital, Edinburgh EH4 2XU, UK  
16 4. Department of Clinical Genetics, Cambridge University Hospitals NHS  
17 Foundation Trust, Cambridge, UK  
18 5. Division of Cardiovascular Medicine, Radcliffe Department of Medicine,  
19 University of Oxford, Oxford, UK

20

21 \*Correspondence to: meh@sanger.ac.uk

22

## 1 Abstract

2 Approximately 2% of *de novo* single nucleotide variants (SNVs) appear as part of  
3 clustered mutations that create multinucleotide variants (MNVs). MNVs are an  
4 important source of genomic variability as they are more likely to alter an encoded  
5 protein than a SNV, which has important implications in disease as well as evolution.  
6 Previous studies of MNVs have focused on their mutational origins and have not  
7 systematically evaluated their functional impact and contribution to disease. We  
8 identified 69,940 MNVs and 106 *de novo* MNVs in 6,688 exome sequenced parent-  
9 offspring trios from the Deciphering Developmental Disorders Study comprising  
10 families with severe developmental disorders. We replicated the previously  
11 described MNV mutational signatures associated with DNA polymerase zeta, an  
12 error-prone translesion polymerase, and the APOBEC family of DNA deaminases.  
13 We found that most MNVs within a single codon create a missense change that  
14 could not have been created by a SNV. MNV-induced missense changes were, on  
15 average, more physico-chemically divergent, more depleted in highly constrained  
16 genes ( $pLI \geq 0.9$ ) and were under stronger purifying selection compared to SNV-  
17 induced missense changes. We found that *de novo* MNVs were significantly  
18 enriched in genes previously associated with developmental disorders in affected  
19 children. This demonstrates that MNVs can be more damaging than SNVs even  
20 when both induce missense changes and are an important variant type to consider  
21 in relation to human disease.  
22

## 1 Main Text

### 2 Introduction

3 In genomic analyses, single nucleotide variants (SNVs) are often considered  
4 independent mutational events. However SNVs are more clustered in the genome  
5 than expected if they were independent (Michaelson et al. 2012; Seidman et al.  
6 1987; Amos 2010). On a finer scale, there is an excess of pairs of mutations within  
7 100 bp that appear to be in perfect linkage disequilibrium in population  
8 samples (Segurel, Wyman, and Przeworski 2014; Stone et al. 2012; Harris and  
9 Nielsen 2014). While some of this can be explained by the presence of mutational  
10 hotspots, natural selection or compensatory mechanisms, it has been shown that  
11 multi-nucleotide mutations play an important role (Schrider, Hourmozdi, and Hahn  
12 2011). Recent studies found that 2.4% of *de novo* SNVs were within 5kb of another  
13 *de novo* SNV within the same individual (Besenbacher et al. 2016), and that 1.9% of  
14 *de novo* SNVs appear within 20bp of another *de novo* SNV (Schrider, Hourmozdi,  
15 and Hahn 2011). Multi-nucleotide variants (MNVs) occurring at neighbouring  
16 nucleotides are the most frequent of all MNVs (Besenbacher et al. 2016). Moreover,  
17 analysis of phased human haplotypes from population sequencing data also showed  
18 that nearby SNVs are more likely to appear on the same haplotype than on different  
19 haplotypes (Schrider, Hourmozdi, and Hahn 2011).

20

21 The mutational origins of MNVs are not as well understood as for SNVs however  
22 different mutational processes leave behind different patterns of DNA change which  
23 are dubbed mutational 'signatures'. Distinct mutational mechanisms have been  
24 implicated in creating MNVs. Polymerase zeta is an error-prone translesion  
25 polymerase that has been shown to be the predominant source of *de novo* MNVs in  
26 adjacent nucleotides in yeast (Harris and Nielsen 2014; Besenbacher et al. 2016).  
27 The most common mutational signatures associated with polymerase zeta in yeast  
28 have also been observed to be the most common signature among MNVs in human  
29 populations (Harris and Nielsen 2014), and were also found to be the most prevalent  
30 in *de novo* MNVs in parent-offspring trios (Besenbacher et al. 2016). A distinct

1 mutational signature has also been described that has been attributed to the action  
2 of APOBEC deaminases (Alexandrov et al. 2013).

3

4 Although MNVs are an important source of genomic variability, their functional  
5 impact and the selection pressures that operate on this class of variation has been  
6 largely unexplored. In part, this is due to many commonly used workflows for variant  
7 calling and annotation of likely functional consequence annotating MNVs as  
8 separate SNVs (Sandmann et al. 2017). When the two variants comprising an MNV  
9 occur within the same codon – as occurs frequently given the propensity for MNVs  
10 at neighbouring nucleotides – interpreting MNVs as separate SNVs can lead to an  
11 erroneous prediction of the impact on the encoded protein. The Exome  
12 Aggregation Consortium (ExAC) systematically identified and annotated over 5,000  
13 MNVs in genes, including some within known disease-associated genes(Lek et al.  
14 2016). Although individual pathogenic MNVs have been described ('ClinVar'), the  
15 pathogenic impact of MNVs as a class of variation is not yet well understood.

16

17 Here we analysed 6,688 exome sequenced parent-offspring trios from the  
18 Deciphering Developmental Disorders (DDD) Study to evaluate systematically the  
19 strength of purifying selection acting on MNVs in the population sample of  
20 unaffected parents, and to quantify the contribution of pathogenic *de novo* MNVs to  
21 developmental disorders in the children.

22

## 1 Results

### 2 Identifying and categorising MNVs

3 We identified 69,940 MNVs transmitted from the 13,376 unaffected trio parents as  
4 well as 106 *de novo* MNVs in the trio children. We defined MNVs as comprising two  
5 variants within 20bp of each other that phased to the same haplotype across >99%  
6 of all individuals in the dataset in which they appear (Figure 1a). This definition  
7 encompasses both MNVs due to a single mutational event and MNVs in which one  
8 SNV occurs after the other. The variants were phased using trio-based phasing,  
9 which meant that the ability to phase the variants was not dependent on the  
10 distance between them and it also provided an additional layer of quality assurance  
11 by conditioning on the variant being called in both parent and child. MNVs tend to  
12 have lower mapping quality than SNVs and so traditional variant filtering criteria  
13 based on quality metrics would potentially miss a substantial number of MNVs. This  
14 also enabled us to use the same filtering criteria for different classes of variants to  
15 ensure comparability. The distance of 20bp between variants was selected as we  
16 observed that pairs of SNVs that define potential MNVs are only enriched for  
17 phasing to the same haplotype at this distance (Figure 1b). *De novo* MNVs were  
18 defined as two *de novo* SNVs within 20bp of each other and were confirmed to be  
19 on the same haplotype using read based phasing. Due to the small numbers we  
20 were able to filter these by manually inspecting these variants using the Integrative  
21 Genomics Viewer (IGV). Ten of the *de novo* MNVs fell within genes previously  
22 associated with dominant developmental disorders. These were all validated  
23 experimentally using MiSeq or capillary sequencing.

Figure 1

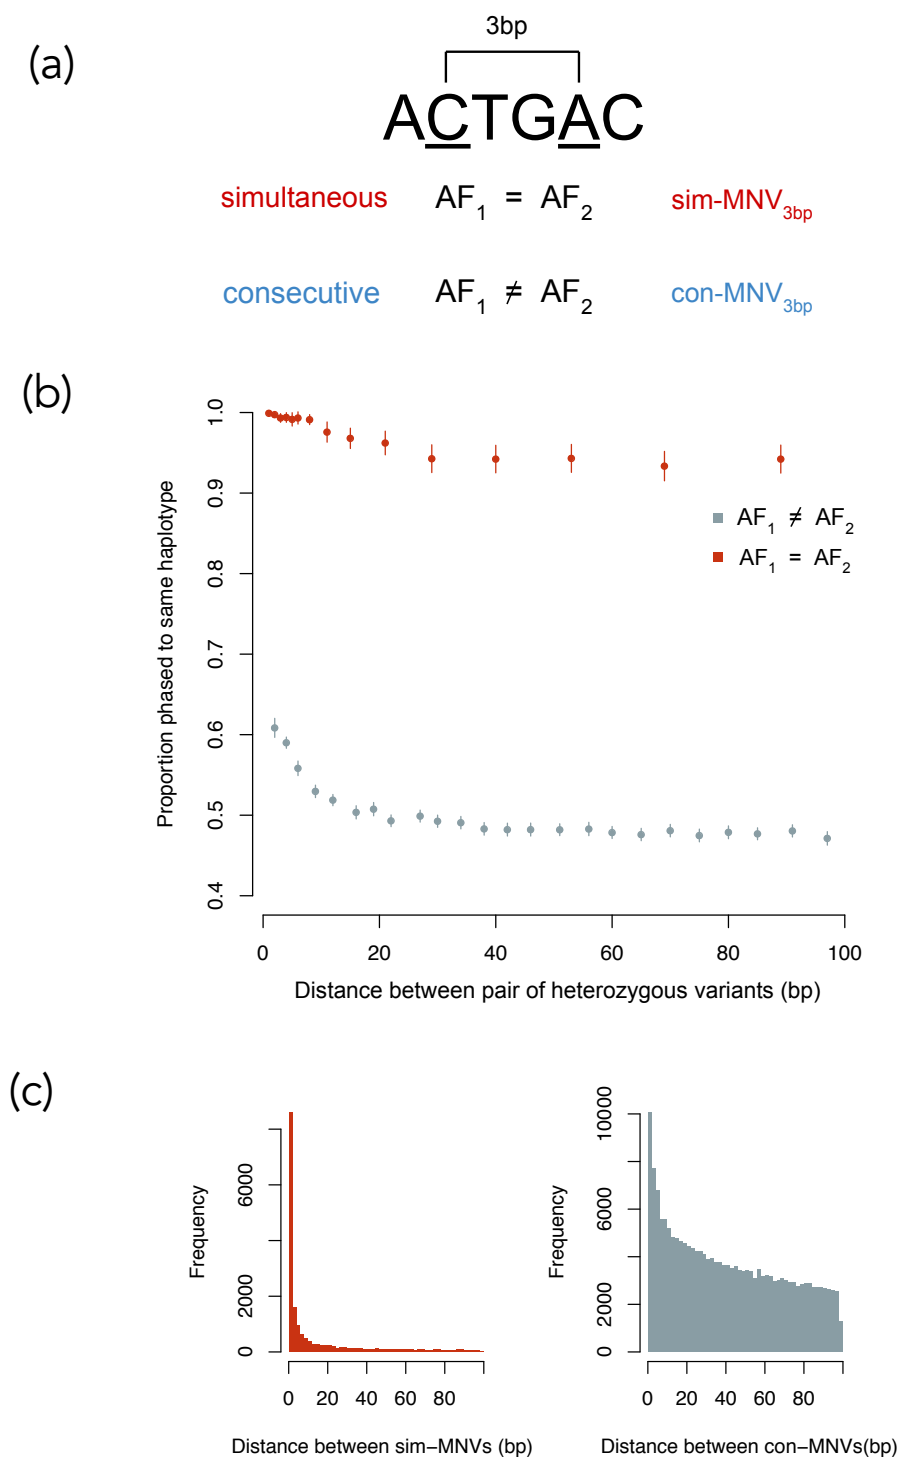

1

2 **Figure 1: Properties of MNVs** (a) Schematic showing how sim-MNVs, two variants  
 3 that occur simultaneously, are defined as having two variants with identical allele  
 4 frequencies and con-MNVs, two variants that occur consecutively, as having  
 5 different allele frequencies (b) Proportion of pairs of heterozygous variants (possible  
 6 MNVs) that phase to the same haplotype as a function of distance separated by sim  
 7 and con. (c) The number of sim-MNVs and con-MNVs by distance between the two  
 8 variants.

1 Different mutational mechanisms are likely to create MNVs at different distances. To  
 2 capture these differences, we stratified analyses of mutational spectra based on  
 3 distance between the variants. The distance between the two variants that make up  
 4 an MNV will be denoted as a subscript. For example, adjacent MNVs will be referred  
 5 to as MNV<sub>1bp</sub>. MNVs can be created by either a single mutational event or by  
 6 consecutive mutational events. For MNVs that were created by a single mutational  
 7 event, the pair of variants are likely to have identical allele frequencies as they are  
 8 unlikely to occur in the population separately (we assume recurrent mutations and  
 9 reversions are rare). The proportion of nearby pairs of SNVs with identical allele  
 10 frequencies that phase to the same haplotype remains close to 100% even at a  
 11 distance of 100bp apart (Figure 1b). We can assume that these variants most likely  
 12 arose simultaneously and will be referred to as sim-MNVs. The proportion of pairs of  
 13 SNVs with different allele frequencies that phase to the same haplotype approaches  
 14 50% at around 20bp. These probably arose consecutively and will be referred to as  
 15 con-MNVs. We observed that sim-MNVs account for 19% of all MNVs and 53% of  
 16 MNV<sub>1bp</sub>. All *de novo* MNVs are, by definition, sim-MNVs as they occurred in the  
 17 same generation.

18

| MNV type        | Distance (bp) | Intra Codon | Inter Codon | Non-coding | TOTAL (% of all MNVs) |
|-----------------|---------------|-------------|-------------|------------|-----------------------|
| sim             | 1             | 1893        | 863         | 3850       | 6606 (9.4%)           |
|                 | 2             | 243         | 350         | 975        | 1568 (2.2%)           |
|                 | 3-20          | -           | 1832        | 2970       | 4802 (6.9%)           |
| con             | 1             | 1155        | 735         | 3923       | 5813 (8.3%)           |
|                 | 2             | 449         | 685         | 2649       | 3783 (5.4%)           |
|                 | 3-20          | -           | 15316       | 32052      | 47368 (67.7%)         |
| TOTAL           |               | 3740        | 19781       | 46419      | 69940                 |
| (% of all MNVs) |               | (5.3%)      | (28.2%)     | (66.4%)    |                       |

19

20 Table 1: Numbers of MNVs in each category type

21

## 22 Analysis of MNV mutational spectra confirms mutational origins.

23 Differences in mutational spectra across different subsets of MNVs can reveal  
 24 patterns or signatures left by the underlying mutational mechanism. We analysed  
 25 the spectra of both simultaneous and consecutive MNV<sub>1bp</sub>, MNV<sub>2bp</sub> and MNV<sub>3-20bp</sub>.

1 For sim-MNVs the proportion of variants that fell into these groups were 51%, 12%  
2 and 37% respectively. For con-MNVs, most variants were further away with the  
3 proportions being 10%,7% and 83% (Table 1). We observed significant differences  
4 between the mutational spectra of sim-MNVs and con-MNVs (Figure S1a, S1c).

5  
6 DNA polymerase zeta, a translesion polymerase, is a known frequent source of *de*  
7 *novo* MNVs and has been associated with the mutational signatures GC->AA and  
8 GA->TT (Harris and Nielsen 2014; Besenbacher et al. 2016). These signatures, and  
9 their reverse complements, account for 22% of all sim-MNV<sub>1bp</sub>s (Figure S1b). These  
10 two signatures made up 18% of the *de novo* sim-MNV<sub>1bp</sub>s which is comparable to  
11 the 20% of observed *de novo* MNVs in a recent study (Figure S2b) (Besenbacher et  
12 al. 2016).

13  
14 APOBEC are a family of cytosine deaminases that are known to cause clustered  
15 mutations in exposed stretches of single-stranded DNA. These mutational  
16 signatures are commonly found in cancer and more recently discovered in germline  
17 mutations (Roberts et al. 2013; Pinto et al. 2016). The most common mutation for  
18 sim-MNV<sub>2bp</sub> is CnC->TnT where n is the intermediate base between the two  
19 mutated bases and for ~8% of the mutations (Figure S1c). They are found primarily  
20 in a TCTC>TITI or CCTC>CITI sequence context (Figure S1d). CC and TC are  
21 known mutational signatures of APOBEC(Harris 2013; Alexandrov et al. 2013; Pinto  
22 et al. 2016). However, the APOBEC signature described previously in germline  
23 mutations were found in pairs of variants that were a larger distance apart (10-50bp).  
24 C...C -> T...T was also the most prolific mutation in sim-MNV<sub>3-20bp</sub> and had a  
25 significantly larger proportion of APOBEC motifs in both variants compared to con-  
26 MNV<sub>3-20bp</sub> (p value 0.0056) (Figure S1e). The mutation C...C -> T...T was the most  
27 frequent *de novo* MNV<sub>2-20bp</sub> (Figure S2c). However only three of the twelve *de novo*  
28 MNV<sub>2-20bp</sub> had APOBEC motifs.

29  
30 Mutational signatures in con-MNVs were primarily driven by CpG sites. In humans,  
31 the 5' C in a CpG context is usually methylated and has a mutation rate that is



1 approximately ten-fold higher than any other context(Duncan and Miller 1980). For  
2 con-MNV<sub>2-30bp</sub> the most common mutation is C...C->T...T and is driven by two  
3 mutated CpG sites CG...CG> TG...TG (S1d). For con-MNV<sub>1bpS</sub>, 24% are accounted  
4 for by the mutation CA->TG, and its reverse complement (S1b). These adjacent  
5 consecutive mutations most likely came about due to a creation of a CpG site by the  
6 first mutation. If the first mutation creates a CpG then the mutations would be  
7 expected to arise in a specific order: CA>CG>TG. We would therefore expect that  
8 the A>G mutation would happen first and that variant would have a higher allele  
9 frequency than the subsequent C>T. This was the case for 96% of the 1,445 CA>TG  
10 con-MNV<sub>1bpS</sub>. This was also the case for 96% and 92% of the other less common  
11 possible CpG creating con-MNVs CC>TG and AG>CA. CA>TG is probably the  
12 most common variant as it relies on a transition mutation A>G happening first which  
13 has a higher mutation rate compared to the transversions C>G and T>G. We also  
14 observed that for con-MNV<sub>1-3bpS</sub> that were not as a result of CpG creating sites, the  
15 first variant increases the mutability of the second variant more than expected by  
16 chance. We compared the median difference in mutation probability of the second  
17 variant based on the heptanucleotide sequence context before and after the first  
18 variant occurred using a signed Wilcoxon Rank Test (Aggarwala and Voight 2016).  
19 The median increase in mutation probability of the second variant was 0.0002  
20 (signed Wilcoxon rank test p-value  $9.8 \times 10^{-17}$ ).

21

## 22 **Functional Consequences of MNVs**

23 The structure of the genetic code is not random. The code has evolved such that the  
24 codons that correspond to amino acids with similar physiochemical properties are  
25 more likely to be separated by a single base change(Amirnovin 1997; Wong 1975).  
26 SNVs that result in a missense change will only alter one of the bases in a codon,  
27 however MNVs that alter a single codon ('intra-codon' MNVs) will alter two of the  
28 three base pairs. Therefore they are more likely to introduce an amino acid that is  
29 further away in the codon table and thus less similar physicochemically to the  
30 original amino acid. Most intra-codon MNVs result in a missense change (Table 2).  
31 Intra-codon missense MNVs can be classified into two groups: 'one-step' and 'two-

1 step' missense MNVs. One-step missense MNVs lead to an amino acid change that  
2 could also have been achieved by an SNV, whereas two-step MNVs generate  
3 amino-acid  
4 changes that could only be achieved by two SNVs. For example if we consider the  
5 codon CAC which codes for Histidine (H) then a single base change in the codon  
6 can lead to missense changes creating seven possible amino acids (Y,R,N,D,P,L,Q)  
7 (Figure 2a). There are one-step missense MNVs within that codon that can lead to  
8 most of the same amino acids (Y,R,N,D,P,L). However two-step missense MNVs  
9 could also lead to an additional eleven amino acids that could not be achieved by  
10 an SNV (F,S,C,I,T,K,S,V,A,E,G). For some codons there are also amino acid changes  
11 that can only be created by a single base change, for this Histidine codon this would  
12 be Glutamine (Q). These will be referred to as exclusive SNV missense changes. For  
13 this analysis we only considered sim-MNVs that most likely originated from the same  
14 mutational event. This is because we were primarily interested in the functional  
15 effects of mutations occurring simultaneously and where the amino acid produced  
16 would have changed directly from the original amino acid to the MNV consequence  
17 and not via an intermediate amino acid.  
18  
19

| MNV Consequence | Sim- MNV (% of all sim-MNVs) | Con-MNV (% of all con-MNVs) |
|-----------------|------------------------------|-----------------------------|
| Synonymous      | 10 (0.5%)                    | 5 (0.3%)                    |
| 1-step missense | 815 (38.2%)                  | 814 (50.7%)                 |
| 2-step missense | 1265 (59.2%)                 | 757 (47.2%)                 |
| Stop Loss       | 2 (0.1%)                     | 4 (0.2%)                    |
| Stop Gain       | 44 (2.0%)                    | 24 (1.5%)                   |

20  
21 Table 2: Numbers and proportions of consequence types for MNVs within same  
22 codon  
23

Figure 2

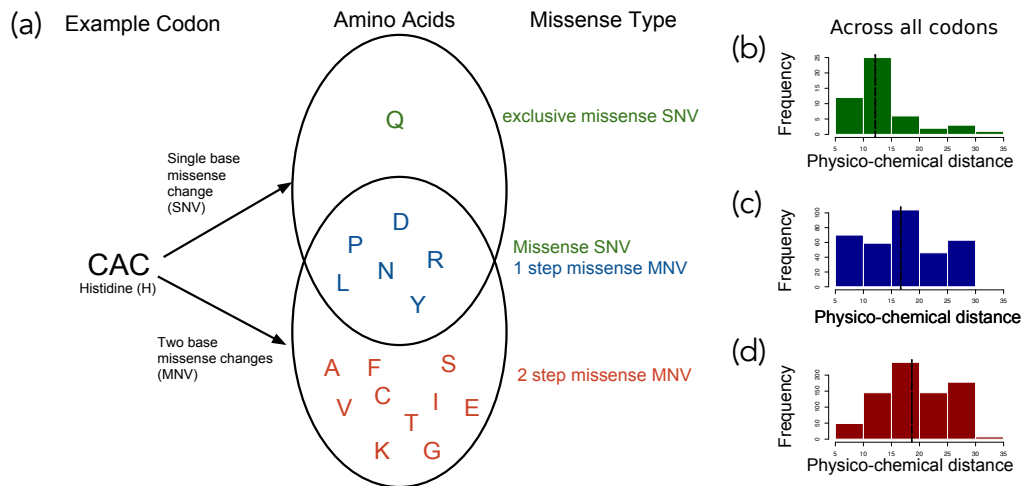

1

2 **Figure 2: Classification of intra-codon MNV missense mutations** (a) Example of how  
 3 one-step missense MNVs and two-step missense MNVs are classified using a single  
 4 codon 'CAC'. Venn diagram shows amino acids that can be created with either a  
 5 single base change or a two base change in the codon 'CAC'. (b-d) Across all  
 6 codons the distribution of physicochemical distances for the amino acid changes  
 7 caused by different types of missense variants, dashed line indicates the median of  
 8 the distribution (b) exclusive SNV missense (c) one-step MNV missense (d) two-step  
 9 MNV missense

10

11 **MNVs can create a missense change with a larger physico-chemical distance**  
 12 **compared to missense SNVs**

13 We assessed the differences in the amino acid changes between exclusive missense  
 14 SNVs, one-step MNVs and two-step MNVs by examining the distribution of  
 15 physicochemical distance for each missense variant type across all codons (Figure  
 16 2b). We used a distance measure between quantitative descriptors of amino acids  
 17 based on multidimensional scaling of 237 physical-chemical properties (Venkatarajan  
 18 and Braun 2001). We chose this measure as it does not depend on observed  
 19 substitution frequencies which may create a bias due to the low MNV mutation rate  
 20 making these amino acid changes inherently less likely. We found that the median  
 21 amino acid distance was significantly larger for two-step missense MNVs when  
 22 compared to one-step missense MNVs (Wilcoxon test, p-value 1.10e-07). The  
 23 median distance for one-step missense MNVs was also significantly larger from  
 24 exclusive SNV missense changes (Wilcoxon test, p-value 0.0008) (Figure 2 b-d).  
 25

## 1 **Missense MNVs are on average more damaging than missense SNVs**

2 If the physico-chemical differences between these classes of missense variants  
3 resulted in more damaging mutations in the context of the protein then we would  
4 expect to see a greater depletion of two-step missense MNVs compared to one-  
5 step missense MNVs or missense SNVs in highly constrained genes. We looked at  
6 the proportion of variants of different classes that fell in highly constrained genes, as  
7 defined by their intolerance of truncating variants in population variation, as  
8 measured by the probability of loss-of-function intolerance (pLI) score (Figure 3a).  
9 Highly constrained genes were defined as those with a pLI score  $\geq 0.9$  (Samocha et  
10 al. 2014). MNVs that impact two nearby codons (inter-codon MNVs) are likely to  
11 have a more severe consequence on protein function, on average, than an SNV  
12 impacting on a single codon. We observed that the proportion of inter-codon MNV<sub>1-</sub>  
13 <sub>20bp</sub> that fall in highly constrained genes (pLI $>0.9$ ) is significantly smaller compared to  
14 missense SNVs (p-value 0.0007) (Figure 3a). For intra-codon MNVs, we saw that the  
15 proportion of two-step missense MNVs observed in highly constrained genes was  
16 also significantly smaller than for missense SNVs (p-value: 0.0016). The proportion of  
17 one-step missense MNVs was not significantly different from either missense SNVs  
18 or two-step missense MNVs. The analysis was repeated using SNVs and MNVs that  
19 were identified by the Exome Aggregation Consortium (ExAC) that were subject to  
20 different filtering steps (Lek et al. 2016). The same relationship was observed, the  
21 proportion of ExAC two-step MNVs in high pLI genes was significantly smaller than  
22 for ExAC missense SNVs (p-value:  $9.84e-06$ ).

23

24 We then compared variant deleteriousness across the variant classes using  
25 Combined Annotation Dependent Depletion (CADD) score that integrates many  
26 annotations such as likely protein consequence, constraint and mappability (Kircher  
27 et al. 2014). We found that the median CADD score for two-step missense MNVs  
28 was significantly higher than both one-step missense MNVs (Wilcoxon test, p value  
29 0.00017) and

Figure 3

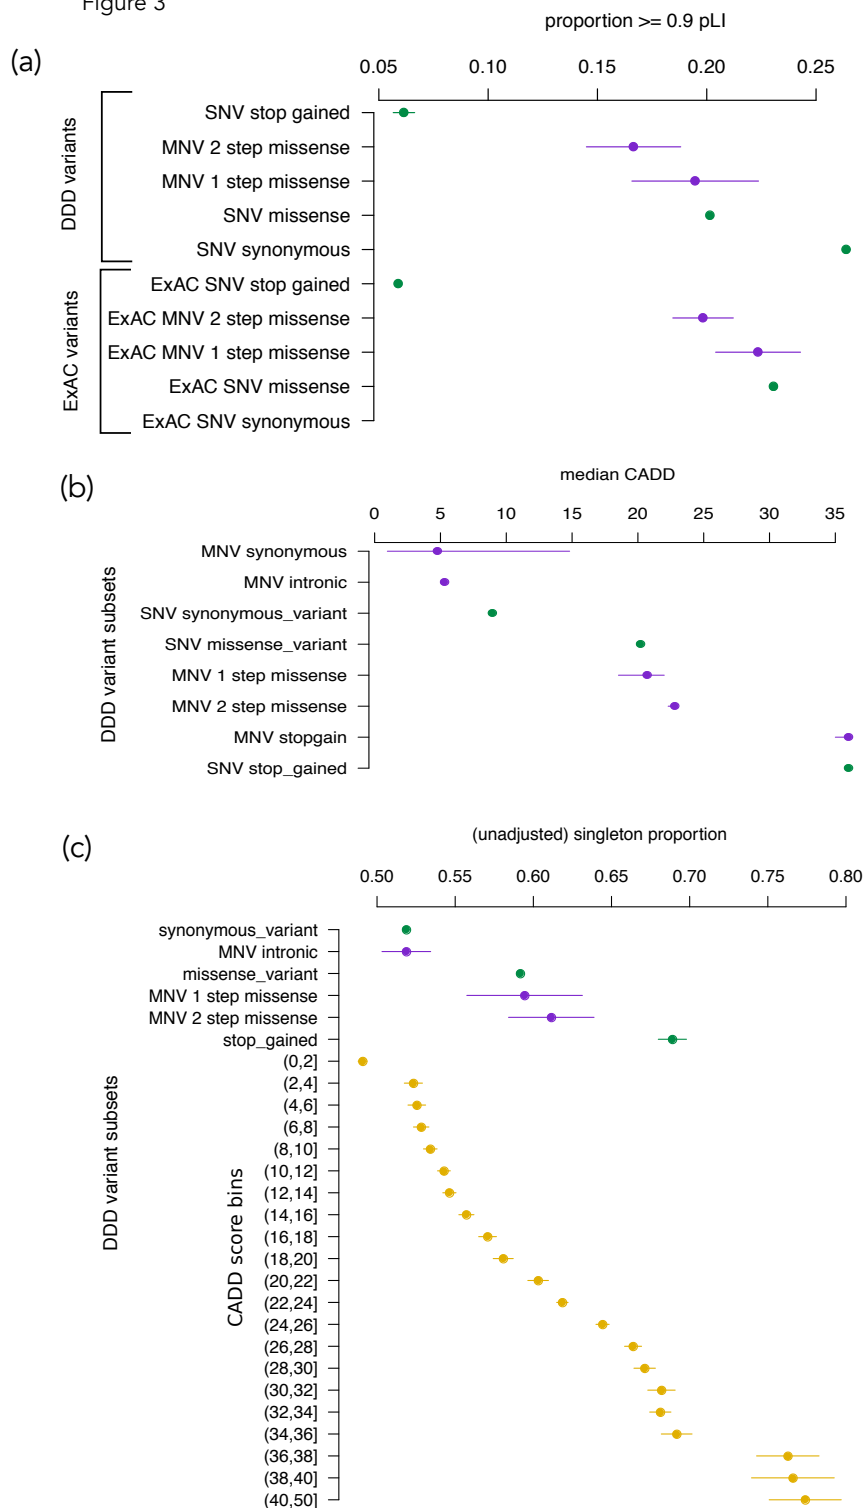

1

2 **Figure 3: Quantifying the pathogenicity of MNVs** (a) Proportion of variants that fall  
3 in genes with pLI  $\geq 0.9$  over different classes of variants for both DDD and ExAC  
4 datasets. Green are SNVs, Purple are MNVs. Lines are 95% confidence intervals (b)  
5 The median CADD score over different classes of variants identified from DDD data  
6 with bootstrapped 95% confidence intervals (c) Singleton proportion for different  
7 classes of DDD variants. In yellow are SNVs stratified by binned CADD scores with  
8 their corresponding singleton proportions. Lines are 95% confidence intervals.

1  
2 missense SNVs (Wilcoxon test,  $p$  value  $2.70 \times 10^{-8}$ ). two-step MNV missense had a  
3 median CADD score of 22.8 compared to a one-step missense median CADD score  
4 of 20.7 and a SNV missense median CADD score of 20.2.

5  
6 The proportion of singletons across variant classes is a good proxy for the strength  
7 of purifying selection acting in a population (Lek et al. 2016). The more deleterious a  
8 variant class, the larger the proportion of singletons. We found that the singleton  
9 proportion for two-step missense MNVs was nominally significantly higher compared  
10 to missense SNVs ( $p$ -value 0.02). The increase in proportion corresponded to an  
11 increase of about two in the interpolated CADD score. This is concordant with the  
12 increase in CADD scores that was computed directly above.

13

#### 14 **Contribution of *de novo* MNVs to developmental disorders**

15 We estimate the genome-wide mutation rate of sim-MNV<sub>1-20bp</sub> to be  $1.78 \times 10^{-10}$   
16 mutations per base pair per generation by scaling the SNV mutation rate based on  
17 the relative ratio of segregating polymorphisms for MNVs and SNVs (Watterson  
18 1975). For this estimate we only used variants that fell into non-constrained genes  
19 ( $pLI < 0.1$ ) and non-coding regions to avoid any bias from selection. We assume that  
20 recurrent mutation is insufficiently frequent for both classes of variation to alter the  
21 proportionality between the number of segregating polymorphisms and the  
22 mutation rate. This estimate is  $\sim 1.6\%$  the mutation rate estimate for SNVs and  
23 accords with the genome-wide proportions of SNVs and MNVs described previously  
24 (Schridder, Hourmozdi, and Hahn 2011). We were concerned that the selective  
25 pressure on MNVs and SNVs would still be different in non-constrained genes and  
26 this might affect our mutation rate estimate. To see if this was the case, we applied  
27 the same method to estimate the SNV missense mutation rate across coding region  
28 and found that our estimate was concordant with that obtained from using an SNV  
29 tri-nucleotide context mutational model (Samocha et al. 2014).

30 We also estimated the MNV mutation rate using the set of *de novo* MNVs that fell  
31 into non-constrained genes ( $pLI < 0.1$ ) that have not previously been associated with

1 dominant developmental disorders and obtained a concordant mutation rate  
2 estimate of  $1.80 \times 10^{-10}$  (confidence interval 0.88,  $2.70 \times 10^{-10}$ ) mutations per base pair  
3 per generation, very similar to the estimate based on segregating polymorphisms  
4 described above.

5  
6 We identified 10 *de novo* MNVs within genes known to be associated with dominant  
7 developmental disorders (DD-associated) in the DDD trios (Table 3), which is a  
8 significant (Poisson test, p value  $1.03 \times 10^{-3}$ ) 3.7 fold enrichment compared with what  
9 we would expect based on our estimated MNV mutation rate. This enrichment is  
10 similar in magnitude to that observed for *de novo* SNVs in the same set of DD-  
11 associated genes (Figure 4). We evaluated whether DD-associated genes are  
12 enriched for the primary mutagenic dinucleotide contexts associated with the  
13 signatures of polymerase zeta to ensure this observation was not driven by  
14 sequence context. We found that DD-associated genes had a small (1.02 fold) but  
15 significant (proportion test, p-value  $1.9 \times 10^{-59}$ ) enrichment of polymerase zeta  
16 dinucleotide contexts compared to genes not associated with DD. However, this  
17 subtle enrichment is insufficient to explain the four-fold enrichment of *de novo*  
18 MNVs in these genes. The enrichment for *de novo* MNVs remains significant after  
19 correcting for sequence context (Poisson test, p value  $2.28 \times 10^{-3}$ ).

20  
21 Eight of the 10 *de novo* MNVs in DD-associated genes were 1bp apart while the  
22 other two were 3 and 13bp apart. All of these *de novo* MNVs were experimentally  
23 validated in the child (and their absence confirmed in both parents) using either  
24 MiSeq or capillary sequencing. All ten MNVs are thought to be pathogenic by the  
25 child's referring clinical geneticist. Seven of the MNVs impacted two different  
26 codons while three fell within the same codon, one of which created a two-step  
27 missense change. Of those MNVs that impacted two codons, five caused a  
28 premature stop codon. Interestingly we found a recurrent *de novo* MNV in the gene  
29 *EHMT1* in two unrelated patients that bore the distinctive polymerase zeta signature  
30 of GA>TT.

31

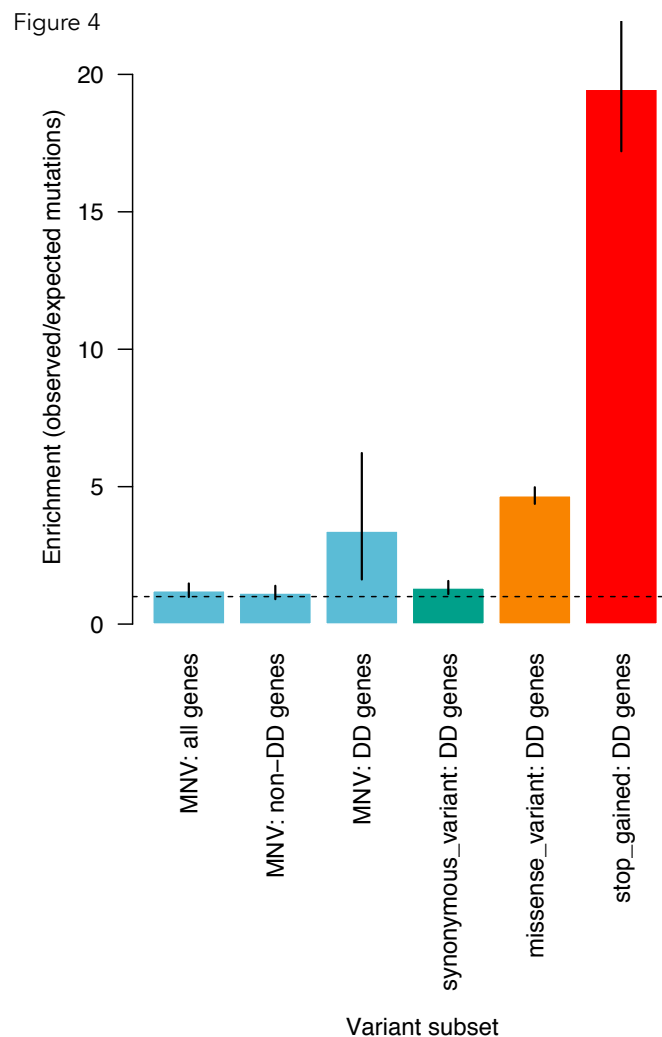

1

2 **Figure 4: Enrichment of de novo MNVs in DDD study** Ratio of observed number of  
3 de novo MNVs vs the expected number of de novo MNVs based on the estimate of  
4 the MNV mutation rate. Compared to enrichment of SNVs in DD genes in  
5 consequence classes synonymous, missense and stop gain.

6 **De Novo MNVs are underrepresented in clinically reported variants in DD-**  
7 **associated genes**

8 To assess whether de novo MNVs are being underreported in genes associated with  
9 DD, we downloaded all clinically reported variants in DD-associated genes from  
10 ClinVar (accessed September 2017). We looked at the number of intra-codon  
11 missense MNVs in genes that have at least one reported pathogenic missense  
12 mutation. This was to ensure that missense mutations in that gene would likely  
13 cause DD. We focused on intra-codon MNVs as it is the interpretation of this class of  
14 MNV that is most impacted by failing to consider the variant as single unit. We  
15 calculated the expected number of pathogenic de novo MNVs in these genes based



1 on the MNV mutation rate and the number of pathogenic SNV missense variants  
2 reported. We observed a significant depletion of only 24 reported pathogenic de  
3 novo MNVs compared to the expected number of 52 across 321 genes (p-value  
4  $2.8 \times 10^{-5}$ , Poisson test).

| Decipher ID | Distance between variants | Chrom | Positions            | Gene          | Ref  | Alt  | Consequence (first variant/second variant) | MNV falls within/between codon | Clinician pathogenicity annotation on Decipher |
|-------------|---------------------------|-------|----------------------|---------------|------|------|--------------------------------------------|--------------------------------|------------------------------------------------|
| 261423      | 1                         | 5     | 161569244, 161569245 | <i>GABRG2</i> | CC   | TT   | missense (two step)                        | Within codon                   | Likely pathogenic (Full)                       |
| 292136      | 1                         | 14    | 29237129, 29237130   | <i>FOXP1</i>  | TC   | CT   | missense (one step)                        | Within codon                   | Likely pathogenic (Full)                       |
| 280956      | 1                         | 19    | 13135878, 13135879   | <i>NFIX</i>   | GC   | TT   | missense (one step)                        | Within codon                   | Likely pathogenic (Partial)                    |
| 270803      | 1                         | 3     | 49114312, 49114313   | <i>QRICH1</i> | GC   | AA   | stop gain/missense                         | Between codon                  | Likely pathogenic (Partial)                    |
| 258688      | 1                         | 5     | 67591021, 67591022   | <i>PIK3R1</i> | TA   | GC   | missense/missense                          | Between codon                  | Likely pathogenic (Full)                       |
| 274482      | 1                         | 16    | 30749053, 30749054   | <i>SRCAP</i>  | GG   | AT   | synonymous/stop gain                       | Between codon                  | Definitely pathogenic (Full)                   |
| 274606      | 1                         | 9     | 140637863, 140637864 | <i>EHMT1</i>  | GA   | TT   | missense/stop gain                         | Between codon                  | Likely pathogenic (Full)                       |
| 274453      | 1                         | 9     | 140637863, 140637864 | <i>EHMT1</i>  | GA   | TT   | missense/stop gain                         | Between codon                  | Definitely pathogenic (Full)                   |
| 260753      | 13                        | 6     | 157454286, 157454297 | <i>ARID1B</i> | G..C | T..G | missense/stop gain                         | Between codon                  | Definitely pathogenic (Full)                   |
| 270916      | 3                         | 1     | 7309651, 7309654     | <i>CAMTA1</i> | G..G | A..A | missense/missense                          | Between codon                  | Likely pathogenic (partial)                    |

1 Table 3: De Novo MNVs that fall in genes associated with developmental disorders

## 1 Discussion

2 MNVs constitute a unique class of variant, both in terms of mutational mechanism  
3 and functional impact. We found that 18% of segregating MNVs were at adjacent  
4 nucleotides. We estimated that 19% of all MNVs represent a single mutational  
5 event, increasing to 53% of MNV<sub>1bp</sub>. We estimated the sim-MNV germline mutation  
6 rate to be  $1.78 \times 10^{-10}$  mutations per base pair per generation, roughly 1.6% that of  
7 SNVs. Most population genetics models assume that mutations arise from  
8 independent events (Harris and Nielsen 2014). MNVs violate that assumption and  
9 this may affect the accuracy of these models. Recent studies suggest that certain  
10 phylogenetic tests of adaptive evolution incorrectly identify positive selection when  
11 the presence of these clustered mutations are ignored (Venkat, Hahn, and Thornton  
12 2017). Correcting these population genetic models will require knowledge of the  
13 rate and spectrum of MNV mutations. We replicated the observations from previous  
14 studies that several different mutational processes underlie MNV formation, and that  
15 these tend to create MNVs of different types. Error-prone polymerase zeta  
16 predominantly creates sim-MNV<sub>1bp</sub> (Harris and Nielsen 2014; Besenbacher et al.  
17 2016). APOBEC-related mutation processes have been described to generate MNVs  
18 in the range of 10-50bp (Roberts et al. 2013; Alexandrov et al. 2013; Harris 2013),  
19 but here we show that an enrichment for APOBEC motifs can be detected down to  
20 MNV<sub>2bp</sub>. Nonetheless, there remain other sim-MNVs that cannot be readily  
21 explained by either of these mechanisms, and it is likely that other, less distinctive,  
22 mutational mechanisms remain to be delineated as catalogs of MNVs increase in  
23 scale. These future studies should also investigate whether these MNV mutational  
24 signatures differ subtly between human populations as has been recently observed  
25 for SNVs (Harris 2015). Consecutive MNVs, by contrast, exhibit greater similarity with  
26 known SNV mutation processes, most notably with the creation and subsequent  
27 mutation of mutagenic CpG dinucleotides. The non-Markovian nature of this  
28 consecutive mutation process challenges Markovian assumptions that are prevalent  
29 within standard population genetic models (Rizzato, Rodriguez, and Laio 2016).  
30

1 Our findings validated the intuitive hypothesis that MNVs that impact upon two  
2 codons within a protein are likely, on average, to have a greater functional impact  
3 than SNVs that alter a single codon. We evaluated the functional impact of intra-  
4 codon MNVs using three complementary approaches: (i) depletion within genes  
5 under strong selective constraint, (ii) shift towards rarer alleles in the site frequency  
6 spectrum and (iii) enrichment of *de novo* mutations in known DD-associated genes  
7 in children with DDs. We demonstrated that intra-codon MNVs also tend to have a  
8 larger functional impact than SNVs, and that MNV missense changes that cannot be  
9 achieved by a single SNV are, on average, more deleterious than those that can.  
10 This is most likely due to the fact that they are on average more physico-chemically  
11 different compared to amino acids created by SNVs and are not as well tolerated in  
12 the context of the encoded protein. These 'two-step' missense MNVs make up more  
13 than half of all sim-MNVs that alter a single codon. We also identified 10 pathogenic  
14 *de novo* MNVs within the DDD study, including both intra-codon and inter-codon  
15 MNVs. With larger trio datasets we will have more power to tease apart more subtle  
16 differences in pathogenic burden and purifying selection between different classes  
17 of MNVs and SNVs, for example, to test whether two-step missense *de novo* MNVs  
18 are more enriched than missense SNVs or one-step missense MNVs in  
19 developmental disorders. More data will also allow us to assess the population  
20 genetic properties of inter-codon MNVs.

21  
22 Our findings emphasise the critical importance of accurately calling and annotating  
23 MNVs within clinical genomic testing both to improve diagnostic sensitivity and to  
24 avoid misinterpretation. We observed that pathogenic *de novo* MNVs are  
25 significantly underrepresented among reported pathogenic clinical variants in  
26 ClinVar, indicating that current analytical workflows have diminished sensitivity for  
27 identifying pathogenic MNVs. In a recent comparison of eight different variant  
28 calling tools it was noted that only two callers, freeBayes and VarDict, report two  
29 mutations in close proximity as MNVs. The others reported them as two separate  
30 SNVs (Sandmann et al. 2017). Both freeBayes and VarDict are haplotype aware  
31 callers which is necessary for MNV detection (Garrison and Marth 2012; Lai et al.

1 2016). Even if variant callers do not identify MNVs directly, software also exists that  
2 can correct a list of previously called SNVs to identify mis-annotated MNVs(Wei et  
3 al. 2015). To further our understanding of the role of MNVs in evolution and disease,  
4 calling and annotating these variants correctly is a vital step.

## 1 **Subjects and Methods**

### 2 **Variant and *De Novo* Calling in DDD**

3 The analysis in this report was conducted using exome sequencing data from the  
4 DDD study of families with a child with a severe, undiagnosed developmental  
5 disorder. The recruitment of these families has been described previously(Wright et  
6 al. 2015). 7833 trios from 7448 families and 1791 singleton patients (without  
7 parental samples) were recruited at 24 clinical genetics centres within the United  
8 Kingdom National Health Service and the Republic of Ireland. Families gave  
9 informed consent to participate, and the study was approved by the UK Research  
10 Ethics Committee (10/H0305/83, granted by the Cambridge South Research Ethics  
11 Committee and GEN/284/12, granted by the Republic of Ireland Research Ethics  
12 Committee). In this analysis, we only included trios from children with unaffected  
13 parents in our analysis to avoid bias from pathogenic inherited MNVs. This was  
14 defined as those trios where the clinicians did not report any phenotypes for either  
15 parent. This resulted in a total of 6,688 complete trios. Sequence alignment and  
16 variant calling of single nucleotide variant and insertions/deletions were conducted  
17 as previously described. *De novo* mutations were called using DeNovoGear and  
18 filtered as before (Deciphering Developmental Disorders 2017).

19

### 20 **Identifying MNVs**

21 MNVs were defined as two nearby variants that always appear on the same  
22 haplotype. To identify all possible candidate MNVs we searched for two  
23 heterozygous variants that were within 100bp of each other in the same individual  
24 across 6,688 DDD proband VCFs and had a read depth of at least 20 for each  
25 variant. These pairs of variants were classified as MNVs if both variants appeared on  
26 the same haplotype for more that 99% of individuals in which they appear. This was  
27 determined by phasing variants using parental exome data. We were able to  
28 determine phase for approximately 2/3 of all possible MNVs across all individuals.  
29 Those that could not be phased were discarded. Read based phasing for these  
30 variants proved to be more error-prone than trio-based phasing and so was not

1 performed. After examining the properties of these MNVs we restricted the analyses  
2 to those that were 1-20bp of each other. We identified 69,940 unique MNVs.

3

4 A set of 693,837 coding SNVs was obtained from the DDD probands with the exact  
5 same ascertainment as those for MNVs (read depth >20, phased to confirm  
6 inheritance). These were used when comparing MNV properties to SNVs to reduce  
7 any ascertainment bias.

8

9 To identify *de novo* MNVs we looked within a set of 51,942 putative DNMs for pairs  
10 of *de novo* variants within 20bp of each other. This set of DNMs had been filtered  
11 requiring a low minor allele frequency (MAF), low strand bias and low number  
12 parental alt reads. We did not impose stricter filters at this stage as true *de novo*  
13 MNVs tend to have worse quality metrics than true *de novo* SNVs. We found 301  
14 pairs, approximately 1.2% of all candidate DNMs. A third of these were 1-2bp apart  
15 (Figure 3a). For analysis of mutational spectra we did not filter these further however  
16 when looking at functional consequences of these *de novo* MNVs we wanted to be  
17 more stringent and examined IGV plots for all *de novo* MNVs of which 106 passed  
18 IGV examination.

19

## 20 **Estimating the MNV mutation rate**

21 We estimated the MNV mutation rate by scaling the SNV mutation rate estimate of  
22  $1.1 \times 10^{-8}$  mutations per base pair per generation by the ratio of MNV segregating  
23 sites/ SNV segregating sites observed in our data set (Roach et al. 2010). This  
24 approach is based on a rearrangement of the equation for the Watterson  
25 estimator (Watterson 1975). This is outlined below where  $\theta$  is the Watterson  
26 estimator,  $\mu$  is the mutation rate,  $K$  denotes the number of segregating sites,  $N_e$   
27 is the effective population size,  $n$  is the sample size and  $a_n$  is  $n-1$ th harmonic number.

28

$$\hat{\theta} = \frac{K_{SNV}}{a_n} = 4N_e\mu_{SNV}$$

29

$$\mu_{SNV} = \frac{K_{SNV}}{a_n 4N_e} = 1.1 \times 10^{-8}$$

30

$$a_n 4N_e = \frac{K_{SNV}}{1.1 \times 10^{-8}}$$

$$\begin{aligned} \mu_{MNV} &= \frac{K_{MNV}}{a_n 4N_e} \\ &= \frac{K_{MNV}}{K_{SNV}} 1.1 \times 10^{-8} \end{aligned}$$

To avoid any potential bias from selection we excluded variants that fell into potentially constrained genes ( $pLI > 0.1$ ). The MNV mutation rate was estimated to be  $1.78 \times 10^{-10}$  mutations per base pair per generation.

We estimated the SNV missense mutation rate in the same way by scaling the overall SNV mutation rate by the ratio of the number of missense SNVs in unconstrained genes compared to all SNVs and obtained an estimate of the missense mutation rate across coding regions to be  $1.07 \times 10^{-8}$  per coding base pair per generation which agrees with the estimate of  $1.09 \times 10^{-8}$  per coding base per generation which was calculated using the trinucleotide context mutational model as described by Samocha et al (Samocha et al. 2014).

### 15 **Enrichment of *de novo* MNVs**

To test for the enrichment of *de novo* MNVs we used a Poisson test for three categories of genes: all genes, genes known to be associated with developmental disorders and genes that are not known to be associated with developmental disorders. Genes known to be associated with developmental disorders, in which *de novo* mutations can be pathogenic, were defined as those curated on the Gene2Phenotype website (EBI 2017) and listed as monoallelic that were 'confirmed' and 'probable' associated with DD. We did the same tests for synonymous, missense and protein-truncating variants using gene-specific mutations rates for each consequence type derived by Samocha et al, 2014 (Samocha et al. 2014) (Figure S3). Significance of these statistical tests was evaluated using a Bonferroni corrected p-value threshold of  $0.05/12$  to take into account the 12 tests across all three subsets of genes, SNV consequence types and MNVs (Figure S3). To correct for sequence context when comparing DD genes and non-DD genes, we adjusted the expected number of MNVs in the DD genes category based on the excess of polymerase zeta dinucleotide contexts. We also estimated the MNV mutation rate



1 using all variants as well as a more stringent estimate just using variants that fell into  
2 non-coding regions. When we redid the enrichment analysis using these mutation  
3 rate estimates of varying stringency, the enrichment of *de novo* MNVs in DD-  
4 associated genes remained significant (all variants p-value:  $2.7 \times 10^{-4}$ , non coding  
5 control regions p-value:  $4.9 \times 10^{-3}$ , Figure S4a). The SNV mutation rate estimate  
6 varies across studies therefore we also recalculated the MNV mutation rates using  
7 SNV mutation rate estimates of  $1.0 \times 10^{-8}$  and  $1.2 \times 10^{-8}$  mutations per base pair per  
8 generation (Segurel, Wyman, and Przeworski 2014). These were also recalculated  
9 across the three different variant subsets (all variants, excluding variants in genes  
10 with  $pLI > 0.1$ , variants in non-coding control regions). The enrichment ratio of *de*  
11 *novo* MNVs that fall into DD genes ranged from 2.7 to 4.8 however always remained  
12 significantly greater than 1 and the confidence intervals consistently overlapped with  
13 that of the SNV missense enrichment ratio (Figure S4b).

14

#### 15 **Analysis of the number of clinically reported *de novo* MNVs**

16 We downloaded all clinically reported variants from the website ClinVar and  
17 subsetted these variants to those that fell into autosomal dominant DDG2P genes  
18 and those that were annotated as 'definitely pathogenic' or 'likely pathogenic'. This  
19 set was then subsetted to 321 genes with at least one pathogenic missense  
20 mutation. This was to ensure that missense mutations cause disease in these genes.  
21 We then counted the numbers of SNV missense variants and used this to estimate  
22 the number of expected missense MNVs across those genes. This was scaled using  
23 the ratio of the SNV to MNV missense mutation rate across these genes. The MNV  
24 missense mutation rate calculated as:

$$25 \quad \mu_{DDG2P \text{ MNV missense}} = \mu_{MNV} * \frac{2}{3} * 0.97 * \sum \text{coding bp in DDG2P genes} ==$$

26 Where  $\frac{2}{3}$  is the probability of an MNV falling within a codon and 0.97 is the  
27 probability that a within-codon MNV results in a missense change. The expected  
28 number of missense MNVs in DDG2P genes was then calculated as follows:

$$29 \quad \text{Expected \#reported pathogenic missense MNVs} \\ 30 \quad = \text{\#reported missense SNVs} * \frac{\mu_{DDG2P \text{ MNV missense}}}{\mu_{DDG2P \text{ SNV missense}}}$$

1

2 This assumes that the enrichment of MNV and SNV missense mutations in these  
3 genes are comparable as we have observed in DDD. This yielded an expected  
4 number of 51.94 reported pathogenic MNVs compared to 24 observed reported  
5 pathogenic MNVs. To test if this difference was significant we performed a poisson  
6 test (p-value  $2.8 \times 10^{-5}$ ).

7

8

9

10

## 1   References

- 2   Aggarwala, V., and B. F. Voight. 2016. 'An expanded sequence context model  
3       broadly explains variability in polymorphism levels across the human  
4       genome', *Nat Genet*, 48: 349-55.
- 5   Alexandrov, L. B., S. Nik-Zainal, D. C. Wedge, S. A. Aparicio, S. Behjati, A. V.  
6       Biankin, G. R. Bignell, N. Bolli, A. Borg, A. L. Borresen-Dale, S. Boyault, B.  
7       Burkhardt, A. P. Butler, C. Caldas, H. R. Davies, C. Desmedt, R. Eils, J. E.  
8       Eyfjord, J. A. Foekens, M. Greaves, F. Hosoda, B. Hutter, T. Ilcic, S.  
9       Imbeaud, M. Imielinski, N. Jager, D. T. Jones, D. Jones, S. Knappskog, M.  
10      Kool, S. R. Lakhani, C. Lopez-Otin, S. Martin, N. C. Munshi, H. Nakamura, P.  
11      A. Northcott, M. Pajic, E. Papaemmanuil, A. Paradiso, J. V. Pearson, X. S.  
12      Puente, K. Raine, M. Ramakrishna, A. L. Richardson, J. Richter, P. Rosenstiel,  
13      M. Schlesner, T. N. Schumacher, P. N. Span, J. W. Teague, Y. Totoki, A. N.  
14      Tutt, R. Valdes-Mas, M. M. van Buuren, L. van 't Veer, A. Vincent-Salomon, N.  
15      Waddell, L. R. Yates, Initiative Australian Pancreatic Cancer Genome, ICGC  
16      Breast Cancer Consortium, ICGC MML-Seq Consortium, ICGC PedBrain, J.  
17      Zucman-Rossi, P. A. Futreal, U. McDermott, P. Lichter, M. Meyerson, S. M.  
18      Grimmond, R. Siebert, E. Campo, T. Shibata, S. M. Pfister, P. J. Campbell,  
19      and M. R. Stratton. 2013. 'Signatures of mutational processes in human  
20      cancer', *Nature*, 500: 415-21.
- 21   Amimovin, R. 1997. 'An analysis of the metabolic theory of the origin of the genetic  
22      code', *J Mol Evol*, 44: 473-6.
- 23   Amos, William. 2010. 'Even small SNP clusters are non-randomly distributed: is this  
24      evidence of mutational non-independence?', *Proceedings of the Royal  
25      Society B: Biological Sciences*.
- 26   Besenbacher, S., P. Sulem, A. Helgason, H. Helgason, H. Kristjansson, A.  
27      Jonasdottir, A. Jonasdottir, O. T. Magnusson, U. Thorsteinsdottir, G. Masson,  
28      A. Kong, D. F. Gudbjartsson, and K. Stefansson. 2016. 'Multi-nucleotide de  
29      novo Mutations in Humans', *PLoS Genet*, 12: e1006315.
- 30   'ClinVar'. Accessed September 2017. (<http://www.ncbi.nlm.nih.gov/clinvar/>).
- 31   Deciphering Developmental Disorders, Study. 2017. 'Prevalence and architecture of  
32      de novo mutations in developmental disorders', *Nature*, 542: 433-38.
- 33   Duncan, B. K., and J. H. Miller. 1980. 'Mutagenic deamination of cytosine residues in  
34      DNA', *Nature*, 287: 560-1.
- 35   EBI. 2017. 'Gene2Phenotype'.  
36      <https://www.ebi.ac.uk/gene2phenotype/downloads/DDG2P.csv.gz>.
- 37   Garrison, Erik, and Gabor Marth. 2012. 'Haplotype-based variant detection from  
38      short-read sequencing', *arXiv preprint arXiv:1207.3907*.
- 39   Harris, K. 2015. 'Evidence for recent, population-specific evolution of the human  
40      mutation rate', *Proc Natl Acad Sci U S A*, 112: 3439-44.
- 41   Harris, K., and R. Nielsen. 2014. 'Error-prone polymerase activity causes  
42      multinucleotide mutations in humans', *Genome Res*, 24: 1445-54.
- 43   Harris, R. S. 2013. 'Cancer mutation signatures, DNA damage mechanisms, and  
44      potential clinical implications', *Genome Med*, 5: 87.

- 1 Kircher, M., D. M. Witten, P. Jain, B. J. O'Roak, G. M. Cooper, and J. Shendure.  
2 2014. 'A general framework for estimating the relative pathogenicity of  
3 human genetic variants', *Nat Genet*, 46: 310-+.
- 4 Lai, Z., A. Markovets, M. Ahdesmaki, B. Chapman, O. Hofmann, R. McEwen, J.  
5 Johnson, B. Dougherty, J. C. Barrett, and J. R. Dry. 2016. 'VarDict: a novel  
6 and versatile variant caller for next-generation sequencing in cancer  
7 research', *Nucleic Acids Res*, 44: e108.
- 8 Lek, M., K. J. Karczewski, E. V. Minikel, K. E. Samocha, E. Banks, T. Fennell, A. H.  
9 O'Donnell-Luria, J. S. Ware, A. J. Hill, B. B. Cummings, T. Tukiainen, D. P.  
10 Birnbaum, J. A. Kosmicki, L. E. Duncan, K. Estrada, F. Zhao, J. Zou, E. Pierce-  
11 Hoffman, J. Berghout, D. N. Cooper, N. Deflaux, M. DePristo, R. Do, J.  
12 Flannick, M. Fromer, L. Gauthier, J. Goldstein, N. Gupta, D. Howrigan, A.  
13 Kiezun, M. I. Kurki, A. L. Moonshine, P. Natarajan, L. Orozco, G. M. Peloso, R.  
14 Poplin, M. A. Rivas, V. Ruano-Rubio, S. A. Rose, D. M. Ruderfer, K. Shakir, P.  
15 D. Stenson, C. Stevens, B. P. Thomas, G. Tiao, M. T. Tusie-Luna, B.  
16 Weisburd, H. H. Won, D. Yu, D. M. Altshuler, D. Ardissino, M. Boehnke, J.  
17 Danesh, S. Donnelly, R. Elosua, J. C. Florez, S. B. Gabriel, G. Getz, S. J. Glatt,  
18 C. M. Hultman, S. Kathiresan, M. Laakso, S. McCarroll, M. I. McCarthy, D.  
19 McGovern, R. McPherson, B. M. Neale, A. Palotie, S. M. Purcell, D. Saleheen,  
20 J. M. Scharf, P. Sklar, P. F. Sullivan, J. Tuomilehto, M. T. Tsuang, H. C.  
21 Watkins, J. G. Wilson, M. J. Daly, D. G. MacArthur, and Consortium Exome  
22 Aggregation. 2016. 'Analysis of protein-coding genetic variation in 60,706  
23 humans', *Nature*, 536: 285-91.
- 24 Michaelson, J. J., Y. J. Shi, M. Gujral, H. C. Zheng, D. Malhotra, X. Jin, M. H. Jian, G.  
25 M. Liu, D. Greer, A. Bhandari, W. T. Wu, R. Corominas, A. Peoples, A. Koren,  
26 A. Gore, S. L. Kang, G. N. Lin, J. Estabillio, T. Gadowski, B. Singh, K. Zhang,  
27 N. Akshoomoff, C. Corsello, S. McCarroll, L. M. Iakoucheva, Y. R. Li, J. Wang,  
28 and J. Sebat. 2012. 'Whole-Genome Sequencing in Autism Identifies Hot  
29 Spots for De Novo Germline Mutation', *Cell*, 151: 1431-42.
- 30 Pinto, Y., O. Gabay, L. Arbiza, A. J. Sams, A. Keinan, and E. Y. Levanon. 2016.  
31 'Clustered mutations in hominid genome evolution are consistent with  
32 APOBEC3G enzymatic activity', *Genome Res*, 26: 579-87.
- 33 Rizzato, Francesca, Alex Rodriguez, and Alessandro Laio. 2016. 'Non-Markovian  
34 effects on protein sequence evolution due to site dependent substitution  
35 rates', *BMC bioinformatics*, 17: 258.
- 36 Roach, J. C., G. Glusman, A. F. Smit, C. D. Huff, R. Hubley, P. T. Shannon, L. Rowen,  
37 K. P. Pant, N. Goodman, M. Bamshad, J. Shendure, R. Drmanac, L. B. Jorde,  
38 L. Hood, and D. J. Galas. 2010. 'Analysis of genetic inheritance in a family  
39 quartet by whole-genome sequencing', *Science*, 328: 636-9.
- 40 Roberts, S. A., M. S. Lawrence, L. J. Klimczak, S. A. Grimm, D. Fargo, P. Stojanov, A.  
41 Kiezun, G. V. Kryukov, S. L. Carter, G. Saksena, S. Harris, R. R. Shah, M. A.  
42 Resnick, G. Getz, and D. A. Gordenin. 2013. 'An APOBEC cytidine  
43 deaminase mutagenesis pattern is widespread in human cancers', *Nat Genet*,  
44 45: 970-6.
- 45 Samocha, K. E., E. B. Robinson, S. J. Sanders, C. Stevens, A. Sabo, L. M. McGrath, J.  
46 A. Kosmicki, K. Rehnstrom, S. Mallick, A. Kirby, D. P. Wall, D. G. MacArthur,

- 1 S. B. Gabriel, M. DePristo, S. M. Purcell, A. Palotie, E. Boerwinkle, J. D.  
2 Buxbaum, E. H. Cook, Jr., R. A. Gibbs, G. D. Schellenberg, J. S. Sutcliffe, B.  
3 Devlin, K. Roeder, B. M. Neale, and M. J. Daly. 2014. 'A framework for the  
4 interpretation of de novo mutation in human disease', *Nat Genet*, 46: 944-  
5 50.
- 6 Sandmann, S., A. O. de Graaf, M. Karimi, B. A. van der Reijden, E. Hellstrom-  
7 Lindberg, J. H. Jansen, and M. Dugas. 2017. 'Evaluating Variant Calling  
8 Tools for Non-Matched Next-Generation Sequencing Data', *Sci Rep*, 7:  
9 43169.
- 10 Schrider, D. R., J. N. Hourmozdi, and M. W. Hahn. 2011. 'Pervasive multinucleotide  
11 mutational events in eukaryotes', *Curr Biol*, 21: 1051-4.
- 12 Segurel, L., M. J. Wyman, and M. Przeworski. 2014. 'Determinants of mutation rate  
13 variation in the human germline', *Annu Rev Genomics Hum Genet*, 15: 47-  
14 70.
- 15 Seidman, M. M., A. Bredberg, S. Seetharam, and K. H. Kraemer. 1987. 'Multiple  
16 Point Mutations in a Shuttle Vector Propagated in Human-Cells - Evidence  
17 for an Error-Prone DNA-Polymerase-Activity', *Proceedings of the National  
18 Academy of Sciences of the United States of America*, 84: 4944-48.
- 19 Stone, J. E., S. A. Lujan, T. A. Kunkel, and T. A. Kunkel. 2012. 'DNA polymerase zeta  
20 generates clustered mutations during bypass of endogenous DNA lesions in  
21 *Saccharomyces cerevisiae*', *Environ Mol Mutagen*, 53: 777-86.
- 22 Venkat, Aarti, Matthew W. Hahn, and Joseph W. Thornton. 2017. 'Multinucleotide  
23 mutations cause false inferences of positive selection', *bioRxiv*.
- 24 Venkatarajan, M. S., and W. Braun. 2001. 'New quantitative descriptors of amino  
25 acids based on multidimensional scaling of a large number of physical-  
26 chemical properties', *Journal of Molecular Modeling*, 7: 445-53.
- 27 Watterson, G. A. 1975. 'On the number of segregating sites in genetical models  
28 without recombination', *Theor Popul Biol*, 7: 256-76.
- 29 Wei, L., L. T. Liu, J. R. Conroy, Q. Hu, J. M. Conroy, C. D. Morrison, C. S. Johnson, J.  
30 Wang, and S. Liu. 2015. 'MAC: identifying and correcting annotation for  
31 multi-nucleotide variations', *BMC Genomics*, 16: 569.
- 32 Wong, J. T. 1975. 'A co-evolution theory of the genetic code', *Proc Natl Acad Sci U  
33 S A*, 72: 1909-12.
- 34 Wright, C. F., T. W. Fitzgerald, W. D. Jones, S. Clayton, J. F. McRae, M. van  
35 Kogelenberg, D. A. King, K. Ambridge, D. M. Barrett, T. Bayzatinova, A. P.  
36 Bevan, E. Bragin, E. A. Chatzimichali, S. Gribble, P. Jones, N. Krishnappa, L.  
37 E. Mason, R. Miller, K. I. Morley, V. Parthiban, E. Prigmore, D. Rajan, A.  
38 Sifrim, G. J. Swaminathan, A. R. Tivey, A. Middleton, M. Parker, N. P. Carter,  
39 J. C. Barrett, M. E. Hurles, D. R. FitzPatrick, H. V. Firth, and D. D. D. study.  
40 2015. 'Genetic diagnosis of developmental disorders in the DDD study: a  
41 scalable analysis of genome-wide research data', *Lancet*, 385: 1305-14.  
42  
43

## 1 Data Access

2 The raw exome sequencing data from this study have been submitted to the  
3 European Genome-phenome Archive (EGA; <https://www.ebi.ac.uk/ega/>) under  
4 accession number EGAS00001000775, and are available following Data Access  
5 Committee (DAC) approval.

## 6 Acknowledgements

7 We thank the families for their participation and patience. The DDD study presents  
8 independent research commissioned by the Health Innovation Challenge Fund  
9 (grant HICF-1009-003), a parallel funding partnership between the Wellcome Trust  
10 and the UK Department of Health, and the Wellcome Sanger Institute (grant  
11 WT098051). The views expressed in this publication are those of the author(s) and  
12 not necessarily those of the Wellcome Trust or the UK Department of Health. The  
13 study has UK Research Ethics Committee approval (10/H0305/83, granted by the  
14 Cambridge South Research Ethics Committee and GEN/284/12, granted by the  
15 Republic of Ireland Research Ethics Committee). The research team acknowledges  
16 the support of the National Institutes for Health Research, through the  
17 Comprehensive Clinical Research Network. We thank the Sanger Human Genome  
18 Informatics team, the Sample Management team, the Illumina High-Throughput  
19 team, the New Pipeline Group team, the DNA pipelines team and the Core  
20 Sequencing team for their support in generating and processing the data.
