## **Integrating healthcare and research genetic data empowers the discovery of 49 novel developmental disorders**

Joanna Kaplanis<sup>1\*</sup>, Kaitlin E. Samocha<sup>1\*</sup>, Laurens Wiel<sup>2,3\*</sup>, Zhancheng Zhang<sup>4\*</sup>, Kevin J. Arvai<sup>4</sup>, Ruth Y. Eberhardt<sup>1</sup>, Giuseppe Gallone<sup>1</sup>, Stefan H. Lelieveld<sup>2</sup>, Hilary C. Martin<sup>1</sup>, Jeremy F. McRae<sup>1</sup>, Patrick J. Short<sup>1</sup>, Rebecca I. Torene<sup>4</sup>, Elke de Boer<sup>5</sup>, Petr Danecek<sup>1</sup>, Eugene J. Gardner<sup>1</sup>, Ni Huang<sup>1</sup>, Jenny Lord<sup>1,6</sup>, Iñigo Martincorena<sup>1</sup>, Rolph Pfundt<sup>5</sup>, Margot R. F. Reijnders<sup>2</sup>, Alison Yeung<sup>7,8</sup>, Helger G. Yntema<sup>2</sup>, DDD Study, Lisenka E. L. M. Vissers<sup>5</sup>, Jane Juusola<sup>4</sup>, Caroline F. Wright<sup>9</sup>, Han G. Brunner<sup>5,10</sup>, Helen V. Firth<sup>1,11</sup>, David R. FitzPatrick<sup>12</sup>, Jeffrey C. Barrett<sup>1</sup>, Matthew E. Hurles<sup>1#†</sup>, Christian Gilissen<sup>2#</sup>, Kyle Retterer<sup>4#</sup>

<sup>1</sup> Wellcome Sanger Institute, Wellcome Genome Campus, Hinxton, UK

<sup>2</sup> Department of Human Genetics, Radboud Institute for Molecular Life Sciences, Radboud University Medical Center, Nijmegen, 6525 GA, the Netherlands

<sup>3</sup> Centre for Molecular and Biomolecular Informatics, Radboud Institute for Molecular Life Sciences, Radboud University Medical Center, Nijmegen, 6525 GA, the Netherlands

<sup>4</sup> GeneDx, Gaithersburg, Maryland, USA

<sup>5</sup> Department of Human Genetics, Donders Institute for Brain, Cognition and Behaviour, Radboud University Medical Center, Nijmegen, 6525 GA, the Netherlands

<sup>6</sup> Human Development and Health, Faculty of Medicine, University of Southampton, UK

<sup>7</sup> Victorian Clinical Genetics Services, Melbourne, Australia

<sup>8</sup> Murdoch Children's Research Institute, Melbourne, Australia

<sup>9</sup> Institute of Biomedical and Clinical Science, University of Exeter Medical School, Research, Innovation, Learning and Development building, Royal Devon & Exeter Hospital, Barrack Road, Exeter EX2 5DW, UK

<sup>10</sup> Department of Clinical Genetics, GROW school for oncology and developmental biology, and MHENS school for mental health and neuroscience, Maastricht University Medical Centre, Maastricht, 6202 AZ, the Netherlands

<sup>11</sup> Department of Clinical Genetics, Cambridge University Hospitals NHS Foundation Trust, Cambridge, UK

<sup>12</sup> MRC Human Genetics Unit, MRC IGMM, University of Edinburgh, Western General Hospital, Edinburgh, UK

\* contributed equally

# contributed equally

† To whom correspondence should be addressed: meh@sanger.ac.uk

1 **Summary**

2 *De novo* mutations (DNMs) in protein-coding genes are a well-established cause of  
3 developmental disorders (DD). However, known DD-associated genes only account for a  
4 minority of the observed excess of such DNMs. To identify novel DD-associated genes, we  
5 integrated healthcare and research exome sequences on 31,058 DD parent-offspring trios, and  
6 developed a simulation-based statistical test to identify gene-specific enrichments of DNMs. We  
7 identified 299 significantly DD-associated genes, including 49 not previously robustly associated  
8 with DDs. Despite detecting more DD-associated genes than in any previous study, much of the  
9 excess of DNMs of protein-coding genes remains unaccounted for. Modelling suggests that  
10 over 500 novel DD-associated genes await discovery, many of which are likely to be less  
11 penetrant than the currently known genes. Research access to clinical diagnostic datasets will  
12 be critical for completing the map of dominant DDs.

13

## 14 Introduction

15 It has previously been estimated that ~42-48% of patients with a severe developmental  
16 disorder (DD) have a pathogenic *de novo* mutation (DNM) in a protein coding gene<sup>1,2</sup>. However,  
17 over half of these patients remain undiagnosed despite the identification of hundreds of  
18 dominant and X-linked DD-associated genes. This implies that there are more DD relevant  
19 genes left to find. Existing methods to detect gene-specific enrichments of damaging DNMs  
20 typically ignore much prior information about which variants and genes are more likely to be  
21 disease-associated. However, missense variants and protein-truncating variants (PTVs) vary in  
22 their impact on protein function<sup>3-6</sup>. Known dominant DD-associated genes are strongly enriched  
23 in the minority of genes that exhibit patterns of strong selective constraint on heterozygous  
24 PTVs in the general population<sup>7</sup>. To identify the remaining DD genes, we need to increase our  
25 power to detect gene-specific enrichments for damaging DNMs by both increasing sample sizes  
26 and improving our statistical methods. In previous studies of pathogenic Copy Number Variation  
27 (CNV), utilising healthcare-generated data has been key to achieve much larger sample sizes  
28 than would be possible in a research setting alone<sup>8,9</sup>.

29

### 30 Improved statistical enrichment test identifies over 300 significant DD-associated genes

31 Following clear consent practices and only using aggregate, de-identified data, we  
32 pooled DNMs in patients with severe developmental disorders from three centres: GeneDx (a  
33 US-based diagnostic testing company), the Deciphering Developmental Disorders study, and  
34 Radboud University Medical Center. We performed stringent quality control on variants and  
35 samples to obtain 45,221 coding and splicing DNMs in 31,058 individuals (**Supplementary Fig.**  
36 **1; Supplementary Table 1**), which includes data on over 24,000 trios not previously published.  
37 These DNMs included 40,992 single nucleotide variants (SNVs) and 4,229 indels. The three  
38 cohorts have similar clinical characteristics, male/female ratios, enrichments of DNMs by  
39 mutational class, and prevalences of known disorders (**Supplementary Fig. 2**).

40 To detect gene-specific enrichments of damaging DNMs, we developed a method  
41 named DeNovoWEST (*De Novo* Weighted Enrichment Simulation Test,  
42 <https://github.com/queenjobo/DeNovoWEST>). DeNovoWEST scores all classes of sequence  
43 variants on a unified severity scale based on the empirically-estimated positive predictive value  
44 of being pathogenic (**Supplementary Fig. 3-4**). We then applied a Bonferroni multiple testing  
45 correction with independent hypothesis weighting<sup>10</sup> to incorporate a gene-based weighting using  
46 the selective constraint against heterozygous PTVs in the general population ( $s_{\text{het}}^{11}$ ), which is  
47 strongly correlated with the likelihood of being a dominant disease gene<sup>7,11</sup>.

48 We first applied DeNovoWEST to all individuals in our cohort and identified 299  
49 significant genes, 35 more than when using our previous method<sup>1</sup> (**Supplementary Fig. 5; Fig.**  
50 **1a**). The majority (181/299; 61%) of these significant genes already had sufficient evidence of

51 DD-association to be considered of diagnostic utility (as of September 2018) by all three  
52 centres, and we refer to them as “consensus” genes. 69/299 of these significant genes were  
53 previously considered diagnostic by one or two centres (“discordant” genes). Applying  
54 DeNovoWEST to synonymous DNMs, as a negative control analysis, identified no significantly  
55 enriched genes (**Supplementary Fig. 6**). To discover novel DD-associated genes with greater  
56 power, we then applied DeNovoWEST only to DNMs in patients without damaging DNMs in  
57 consensus genes (we refer to this subset as ‘undiagnosed’ patients) and identified 118  
58 significant genes (**Fig. 1b**; **Supplementary Fig. 7**; **Supplementary Table 2**). While 69 of these  
59 genes were discordant genes, we identified 49 ‘novel’ DD-associated genes, which had a  
60 median of 10 nonsynonymous DNMs in our dataset (**Fig. 1c**; **Supplementary Table 3**). There  
61 were 500 patients with nonsynonymous DNMs in these 49 genes (1.6% of our cohort); all DNMs  
62 in these genes were inspected in IGV<sup>12</sup> and, of 198 for which experimental validation was  
63 attempted, all were confirmed as DNMs in the proband. The DNMs in these novel genes were  
64 distributed approximately randomly across the three datasets (no genes with  $p < 0.001$ ,  
65 heterogeneity test). Fourteen of the 49 novel DD-associated genes have been further  
66 corroborated by recent OMIM entries or publications. In particular, seven of these 14 genes  
67 (*PPP2CA*<sup>13</sup>, *ZMIZ1*<sup>14</sup>, *CDK8*<sup>15</sup>, *VAMP2*<sup>16</sup>, *KMT2E*<sup>17</sup>, *KDM6B*<sup>18</sup>, and *TAOK1*<sup>19</sup>) have had  
68 genotype-phenotype studies recently published.

69 We also investigated whether some synonymous DNMs might be pathogenic by  
70 disrupting splicing. We annotated all synonymous DNMs with a splicing pathogenicity score,  
71 SpliceAI<sup>20</sup>, and identified a significant enrichment of synonymous DNMs with high SpliceAI  
72 scores ( $\geq 0.8$ , 1.56-fold enriched,  $p = 0.0037$ , Poisson test; **Supplementary Table 4**). This  
73 enrichment corresponds to an excess of ~15 splice-disrupting synonymous mutations in our  
74 cohort, of which six are accounted for by a single recurrent synonymous mutation in *KAT6B*  
75 known to disrupt splicing<sup>21</sup>.

76

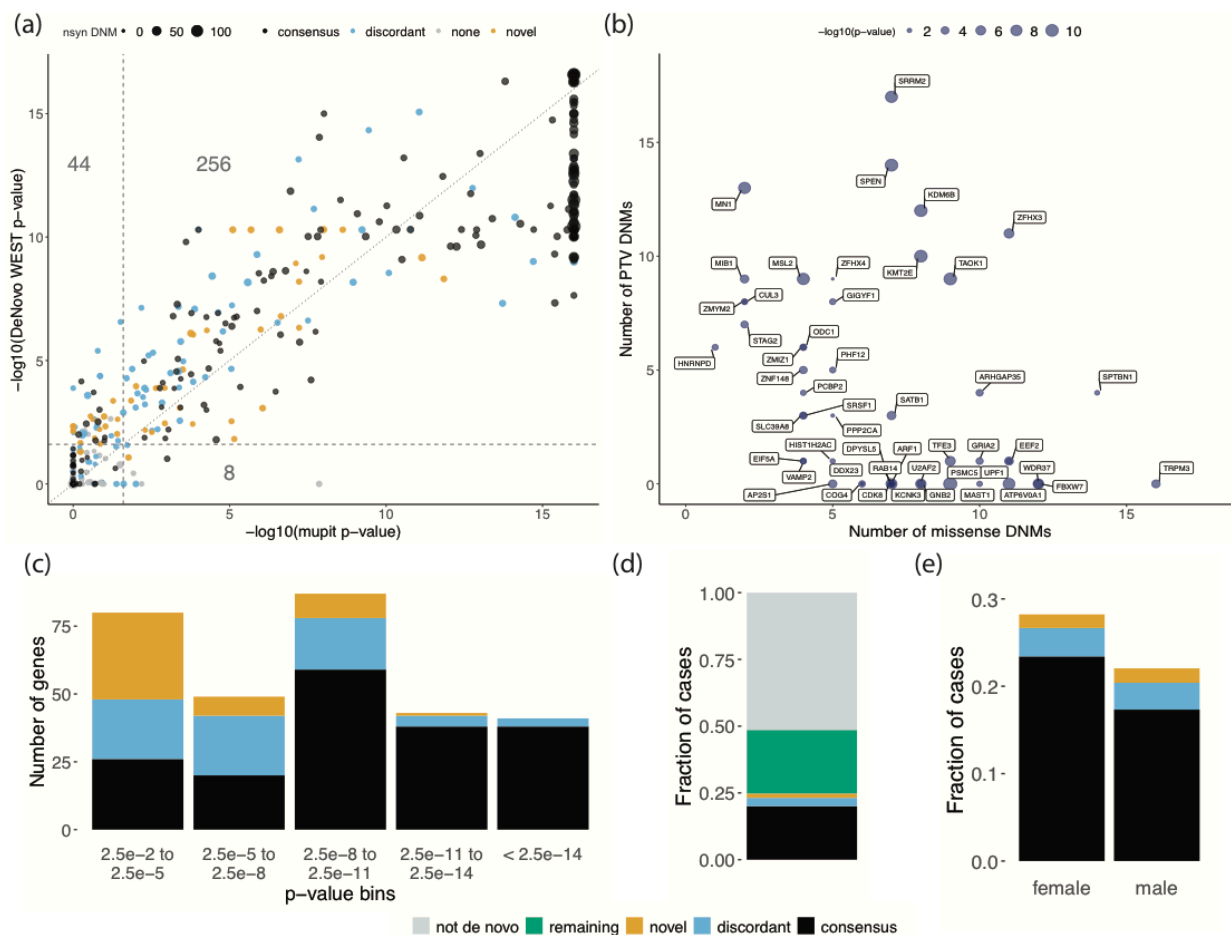

77 **Figure 1: Results of DeNovoWEST analysis.** (a) Comparison of p-values generated using the  
 78 new method (DeNovoWEST) versus the previous method (mupit)<sup>1</sup>. These are results from  
 79 DeNovoWEST run on the full cohort. The dashed lines indicate the threshold for genome-wide  
 80 significance (the p-values have already been corrected for multiple testing). The size of the  
 81 points is proportional to the number of nonsynonymous DNMs in our cohort (nsyn). The  
 82 numbers describe the number of genes that fall into each quadrant (43 in the top left, 256 in the  
 83 top right, and 8 in the bottom right). (b) The number of missense and PTV DNMs in our cohort in  
 84 the 49 novel genes. The size of the points are proportional to the  $\log_{10}(\text{p-value})$  from the  
 85 analysis on the undiagnosed subset. (c) The histogram depicts the distribution of p-values from  
 86 the analysis on the undiagnosed subset for discordant and novel genes; p-values for consensus  
 87 genes come from the full analysis. The number of genes in each p-value bin is coloured by  
 88 diagnostic gene group. (d) The fraction of cases with a nonsynonymous mutation in each  
 89 diagnostic gene group. (e) The fraction of cases with a nonsynonymous mutation in each  
 90 diagnostic gene group split by sex. In all figures, black represents the consensus known genes,  
 91 blue represents the discordant known genes, and orange represents the novel genes. In (c),  
 92 green represents the remaining fraction of cases expected to have a pathogenic *de novo* coding  
 93 mutation (“remaining”) and grey is the fraction of cases that are likely to be explained by other  
 94 genetic or nongenetic factors (“not de novo”).

95  
96 Taken together, 24.8% of individuals in our combined cohort have a nonsynonymous  
97 DNM in one of the consensus or significant DD-associated genes (**Fig. 1d**). We noted  
98 significant sex differences in the autosomal burden of nonsynonymous DNMs (**Supplementary**  
99 **Fig. 8**). The rate of nonsynonymous DNMs in consensus autosomal genes was significantly  
100 higher in females than males (OR = 1.17,  $p = 1.1 \times 10^{-7}$ , Fisher's exact test; **Fig. 1e**), as noted  
101 previously<sup>1</sup>. However, the exome-wide burden of autosomal nonsynonymous DNMs in all genes  
102 was not significantly different between undiagnosed males and females (OR = 1.03,  $p = 0.29$ ,  
103 Fisher's exact test). This suggests the existence of subtle sex differences in the genetic  
104 architecture of DD, especially with regard to known and undiscovered disorders.

105

### 106 **Characteristics of the novel DD-associated genes and disorders**

107 Based on semantic similarity<sup>22</sup> between Human Phenotype Ontology terms, patients with  
108 DNMs in the same novel DD-associated gene were less phenotypically similar to each other, on  
109 average, than patients with DNMs in a consensus gene ( $p = 9.5 \times 10^{-38}$ , Wilcoxon rank-sum test;  
110 **Fig. 2a**). This suggests that these novel disorders less often result in distinctive and consistent  
111 clinical presentations, which may have made these disorders harder to discover via a  
112 phenotype-driven analysis or recognise by clinical presentation alone. Each of these novel  
113 disorders requires a detailed genotype-phenotype characterisation, which is beyond the scope  
114 of this study.

115 Overall, novel DD-associated genes encode proteins that have very similar functional  
116 and evolutionary properties to consensus genes, e.g. developmental expression patterns,  
117 network properties and biological functions (**Fig. 2b**; **Supplementary Table 5**). Despite the  
118 high-level functional similarity between known and novel DD-associated genes, the  
119 nonsynonymous DNMs in the more recently discovered DD-associated genes are much more  
120 likely to be missense DNMs, and less likely to be PTVs (discordant and novel;  $p = 3.3 \times 10^{-21}$ ,  
121 chi-squared test). Sixteen of the 49 (33%) of the novel genes only had missense DNMs, and  
122 only a minority had more PTVs than missense DNMs. Consequently, we expect that a greater  
123 proportion of the novel genes will act via altered-function mechanisms (e.g. dominant negative  
124 or gain-of-function). For example, the novel gene *PSMC5* (DeNovoWEST  $p = 6.5 \times 10^{-10}$ ) had  
125 one inframe deletion and nine missense DNMs, eight of which altered one of two amino acids  
126 that interact within the 3D protein structure: p.Pro320Arg and p.Arg325Trp (**Supplementary**  
127 **Fig. 9a-b**), and so is likely to operate via an altered-function mechanism. Additionally, we  
128 identified one novel DD-associated gene, *MN1*, with *de novo* PTVs significantly ( $p = 1.6 \times 10^{-7}$ ,  
129 Poisson test) clustered at the 3' end of its transcript (**Supplementary Fig. 9c**). This clustering of  
130 PTVs indicates the transcript likely escapes nonsense mediated decay and potentially acts via a

131 gain-of-function or dominant negative mechanism<sup>23</sup>, although this will require functional  
 132 confirmation.

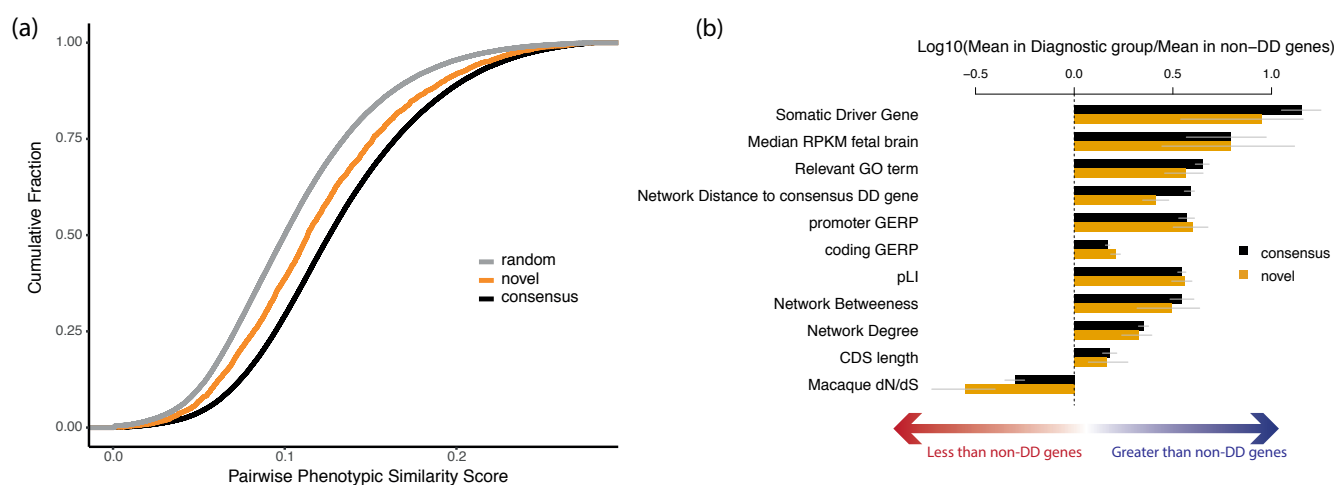

133  
 134 **Figure 2: Functional properties and mechanisms of novel genes.** (a) Comparing the  
 135 phenotypic similarity of patients with DNMs in novel and consensus genes. Random phenotypic  
 136 similarity was calculated from random pairs of patients. Patients with DNMs in the same novel  
 137 DD-associated gene were less phenotypically similar than patients with DNMs in a known DD-  
 138 associated gene ( $p = 9.5 \times 10^{-38}$ , Wilcoxon rank-sum test). (b) Comparison of functional  
 139 properties of consensus known and novel DD genes. Properties were chosen as those known to  
 140 be differential between consensus and non-DD genes.

141  
 142 We observed that missense DNMs were more likely to affect functional protein domains  
 143 than other coding regions. We observed a 2.76-fold enrichment ( $p = 1.6 \times 10^{-68}$ , G-test) of  
 144 missense DNMs residing in protein domains among consensus genes and a 1.87-fold  
 145 enrichment ( $p = 1.4 \times 10^{-4}$ , G-test) in novel DD-associated genes, but no enrichment for  
 146 synonymous DNMs (**Supplementary Table 6**). Three protein domain families in consensus  
 147 genes were specifically enriched for missense DNMs (**Supplementary Table 7**): ion transport  
 148 protein (PF00520,  $p = 3.9 \times 10^{-7}$ , G-test), ligand-gated ion channel (PF00060,  $p = 6.7 \times 10^{-7}$ , G-  
 149 test), and protein kinase domain (PF00069,  $p = 4.4 \times 10^{-2}$ , G-test). Missense DNMs in all three  
 150 enriched domain families, have previously been associated with DD (**Supplementary Table**  
 151 **8**)<sup>24</sup>.

152 We observed a significant overlap between the 299 DNM-enriched DD-associated genes  
 153 and a set of 369 previously described cancer driver genes<sup>25</sup> ( $p = 1.7 \times 10^{-46}$ , logistic regression  
 154 correcting for  $s_{het}$ ), as observed previously<sup>26,27</sup>, as well as a significant enrichment of  
 155 nonsynonymous DNMs in these genes (**Supplementary Table 9**). This overlap extends to  
 156 somatic driver mutations: we observe 117 DNMs at 76 recurrent somatic mutations observed in  
 157 at least three patients in The Cancer Genome Atlas (TCGA)<sup>28</sup>. By modelling the germline



158 mutation rate at these somatic driver mutations, we found that recurrent nonsynonymous  
159 mutations in TCGA are enriched 21-fold in the DDD cohort ( $p < 10^{-50}$ , Poisson test,  
160 **Supplementary Fig. 9**), whereas recurrent synonymous mutations in TCGA are not significantly  
161 enriched (2.4-fold,  $p = 0.13$ , Poisson test). This suggests that this observation is driven by the  
162 pleiotropic effects of these mutations in development and tumourigenesis, rather than  
163 hypermutability.

164

### 165 ***Recurrent mutations and potential new germline selection genes***

166 We identified 773 recurrent DNMs (736 SNVs and 37 indels), ranging from 2-36  
167 independent observations per DNM, which allowed us to interrogate systematically the factors  
168 driving recurrent germline mutation. We considered three potential contributory factors: (i)  
169 clinical ascertainment enriching for pathogenic mutations, (ii) greater mutability at specific sites,  
170 and (iii) positive selection conferring a proliferative advantage in the male germline, thus  
171 increasing the prevalence of sperm containing the mutation<sup>29</sup>. We observed strong evidence  
172 that all three factors contribute, but not necessarily mutually exclusively. Clinical ascertainment  
173 drives the observation that 65% of recurrent DNMs were in consensus genes, a 5.4-fold  
174 enrichment compared to DNMs only observed once ( $p < 10^{-50}$ , proportion test). Hypermutability  
175 underpins the observation that 68% of recurrent *de novo* SNVs occurred at hypermutable CpG  
176 dinucleotides<sup>30</sup>, a 1.8-fold enrichment over DNMs only observed once ( $p = 1.1 \times 10^{-59}$ ,  
177 proportion test). We also observed a striking enrichment of recurrent mutations at the  
178 haploinsufficient DD-associated gene *MECP2*, in which we observed 11 recurrently mutated  
179 SNVs within a 500bp window, nine of which were G to A mutations at a CpG dinucleotide.  
180 *MECP2* exhibits a highly significant twofold excess of synonymous mutations within the  
181 Genome Aggregation Database (gnomAD) population variation resource<sup>5</sup>, suggesting that  
182 locus-specific hypermutability might explain this observation.

183 To assess the contribution of germline selection to recurrent DNMs, we initially focused  
184 on the 12 known germline selection genes, which all operate through activation of the RAS-  
185 MAPK signalling pathway<sup>31,32</sup>. We identified 39 recurrent DNMs in 11 of these genes, 38 of  
186 which are missense and all of which are known to be activating in the germline (see  
187 supplement). As expected, given that hypermutability is not the driving factor for recurrent  
188 mutation in these germline selection genes, these 39 recurrent DNMs were depleted for CpGs  
189 relative to other recurrent mutations (9/39 vs 450/692,  $p = 0.0067$ , chi-squared test).

190 Positive germline selection has been shown to be capable of increasing the apparent  
191 mutation rate more strongly<sup>29</sup> than either clinical ascertainment (10-100X in our dataset) or  
192 hypermutability (~10X for CpGs). However, only a minority of the most highly recurrent  
193 mutations in our dataset are in genes that have been previously associated with germline  
194 selection. Nonetheless, several lines of evidence suggested that the majority of these most



195 highly recurrent mutations are likely to confer a germline selective advantage. Based on the  
 196 recurrent DNMs in known germline selection genes, DNMs under germline selection should be  
 197 more likely to be activating missense mutations, and should be less enriched for CpG  
 198 dinucleotides. **Table 1** shows the 16 *de novo* SNVs observed nine or more times in our DNM  
 199 dataset, only two of which are in known germline selection genes (*MAP2K1* and *PTPN11*). All  
 200 but two of these 16 *de novo* SNVs cause missense changes, all but two of these genes cause  
 201 disease by an altered-function mechanism, and these DNMs were depleted for CpGs relative to  
 202 all recurrent mutations. Two of the genes with highly recurrent *de novo* SNVs, *SHOC2* and  
 203 *PPP1CB*, encode interacting proteins that are known to play a role in regulating the RAS-MAPK  
 204 pathway, and pathogenic variants in these genes are associated with a Noonan-like  
 205 syndrome<sup>33</sup>. Moreover, two of these recurrent DNMs are in the same gene *SMAD4*, which  
 206 encodes a key component of the TGF-beta signalling pathway, potentially expanding the  
 207 pathophysiology of germline selection beyond the RAS-MAPK pathway. Confirming germline  
 208 selection of these mutations will require deep sequencing of testes and/or sperm<sup>32</sup>.  
 209

| Symbol  | Chr | Position  | Ref | Alt | Consequence | Recur | Likely mechanism      | CpG | Somatic Driver Gene | Germline Selection Gene | DD status  |
|---------|-----|-----------|-----|-----|-------------|-------|-----------------------|-----|---------------------|-------------------------|------------|
| PACS1   | 11  | 65978677  | C   | T   | missense    | 36    | activating            | Yes | -                   | -                       | consensus  |
| PPP2R5D | 6   | 42975003  | G   | A   | missense    | 22    | dominant negative     | -   | -                   | -                       | consensus  |
| SMAD4   | 18  | 48604676  | A   | G   | missense    | 21    | activating            | -   | Yes                 | -                       | consensus  |
| PACS2   | 14  | 105834449 | G   | A   | missense    | 13    | dominant negative     | Yes | -                   | -                       | discordant |
| MAP2K1  | 15  | 66729181  | A   | G   | missense    | 11    | activating            | -   | Yes                 | Yes                     | consensus  |
| PPP1CB  | 2   | 28999810  | C   | G   | missense    | 11    | all missense/in frame | -   | -                   | -                       | consensus  |
| NAA10   | X   | 153197863 | G   | A   | missense    | 11    | all missense/in frame | Yes | -                   | -                       | consensus  |
| MECP2   | X   | 153296777 | G   | A   | stop gain   | 11    | loss of function      | Yes | -                   | -                       | consensus  |
| CSNK2A1 | 20  | 472926    | T   | C   | missense    | 10    | activating            | -   | -                   | -                       | consensus  |
| CDK13   | 7   | 40085606  | A   | G   | missense    | 10    | all missense/in frame | -   | -                   | -                       | consensus  |
| SHOC2   | 10  | 112724120 | A   | G   | missense    | 9     | activating            | -   | -                   | -                       | consensus  |
| PTPN11  | 12  | 112915523 | A   | G   | missense    | 9     | activating            | -   | Yes                 | Yes                     | consensus  |
| SMAD4   | 18  | 48604664  | C   | T   | missense    | 9     | activating            | Yes | Yes                 | -                       | consensus  |
| SRCAP   | 16  | 30748664  | C   | T   | stop gain   | 9     | dominant negative     | Yes | -                   | -                       | consensus  |
| FOXP1   | 3   | 71021817  | C   | T   | missense    | 9     | loss of function      | Yes | -                   | -                       | consensus  |
| CTBP1   | 4   | 1206816   | G   | A   | missense    | 9     | dominant negative     | Yes | -                   | -                       | discordant |

210

211

212 **Table 1: Recurrent Mutations.** *De novo* single nucleotide variants with more than 9  
 213 recurrences in our cohort annotated with relevant information, such as CpG status, whether the  
 214 impacted gene is a known somatic driver or germline selection gene, and diagnostic gene group  
 215 (e.g. consensus known). “Recur” refers to number of recurrence. “Likely mechanism” refers to  
 216 mechanisms attributed to this gene in the published literature.

## 217 **Evidence for incomplete penetrance and pre/perinatal death**

218 Nonsynonymous DNMs in consensus or significant DD-associated genes accounted for  
219 half of the exome-wide nonsynonymous DNM burden associated with DD (**Fig. 1b**). Despite our  
220 identification of 299 significantly DD-associated genes, there remains a substantial burden of  
221 both missense and protein-truncating DNMs in unassociated genes (those that are neither  
222 significant in our analysis nor on the consensus gene list). The remaining burden of protein-  
223 truncating DNMs is greatest in genes that are intolerant of PTVs in the general population  
224 (**Supplementary Fig. 11**) suggesting that more haploinsufficient (HI) disorders await discovery.  
225 We estimated that our statistical power to detect the gene enrichment for protein-truncating  
226 DNMs expected for an HI disorder was lower in unassociated genes compared to the novel DD-  
227 associated genes ( $p = 2.9 \times 10^{-6}$  Wilcoxon rank-sum test; **Fig. 3a**). However, the novel genes do  
228 not have significantly less power compared to the consensus genes ( $p = 0.059$ , Wilcoxon rank-  
229 sum test).

230 A key parameter in the above power analysis is the fold-enrichment of *de novo* PTVs  
231 expected in as yet undiscovered HI disorders, which we assumed above to be 37-fold, based on  
232 the average enrichment observed in known HI DD-associated genes. However, we observed  
233 that novel DD-associated HI genes had significantly lower PTV enrichment compared to the  
234 consensus HI genes ( $p = 1.6 \times 10^{-5}$ , Poisson test; **Fig. 3b**). Two additional factors that could  
235 lower DNM enrichment, and thus power to detect a novel DD-association, are reduced  
236 penetrance and increased pre/perinatal death, which here covers spontaneous fetal loss,  
237 termination of pregnancy for fetal anomaly, stillbirth, and early neonatal death. To evaluate  
238 incomplete penetrance, we investigated whether HI genes with a lower enrichment of protein-  
239 truncating DNMs in our cohort are associated with greater prevalences of PTVs in the general  
240 population. We observed a significant ( $p = 0.031$ , weighted linear regression) negative  
241 correlation between PTV enrichment in our cohort and the ratio of PTV to synonymous variants  
242 in the gnomAD dataset of population variation<sup>5</sup>, suggesting that incomplete penetrance does  
243 lower *de novo* PTV enrichment in our cohort (**Fig. 3c**).

244 Additionally, we observed that the fold-enrichment of protein-truncating DNMs in  
245 consensus HI DD-associated genes in our cohort was significantly lower for genes with a  
246 medium or high likelihood of presenting with a prenatal structural malformation ( $p = 0.0002$ ,  
247 Poisson test, **Fig. 3d**), suggesting that pre/perinatal death decreases our power to detect some  
248 novel DD-associated disorders (see supplement for details).

249

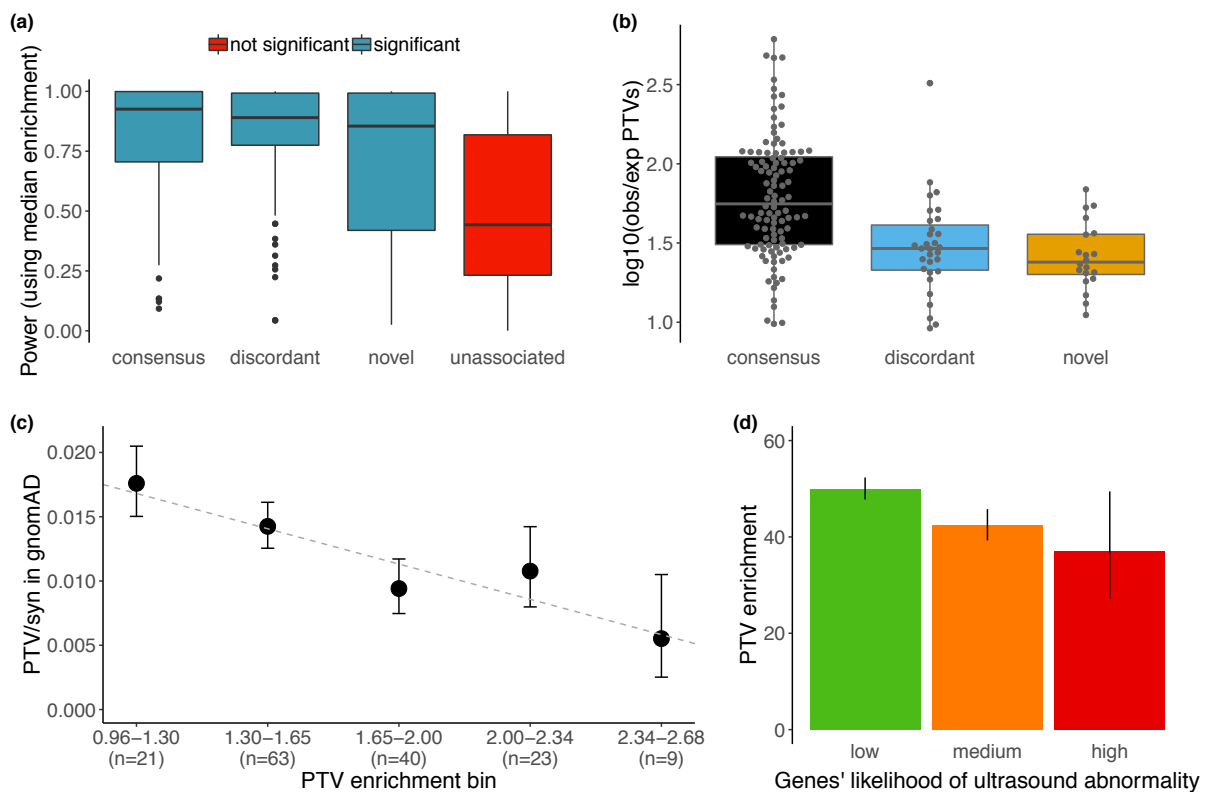

250  
 251 **Figure 3: Impact of pre/perinatal death and penetrance on power.** (a) Power to detect  
 252 median PTV enrichment (36.6) in consensus known genes across diagnostic groups. Genes  
 253 that were not significantly associated to DD in our analysis (“unassociated”) have significantly  
 254 lower power than the novel genes ( $p = 2.9 \times 10^{-6}$ , Wilcox rank-sum test). (b) Distribution of PTV  
 255 enrichment in significant, likely haploinsufficient, genes by diagnostic group. (c) Comparison of  
 256 the PTV enrichment in our cohort vs the PTV to synonymous ratio found in gnomAD. PTV  
 257 enrichment is shown as  $\log_{10}(\text{enrichment})$ . There is a significant negative relationship ( $p =$   
 258  $0.031$ , weighted regression). (d) Overall *de novo* PTV enrichment (observed / expected PTVs)  
 259 across genes grouped by their clinician-assigned likelihood of presenting with a structural  
 260 malformation on ultrasound during pregnancy. PTV enrichment is significantly lower for genes  
 261 with a medium or high likelihood compared to genes with a low likelihood ( $p = 0.002$ , Poisson  
 262 test).

263

### 264 **Modelling reveals hundreds of DD genes remain to be discovered**

265 To understand the likely trajectory of future DD discovery efforts, we downsampled the  
 266 current cohort and reran our enrichment analysis (**Fig. 4a**). We observed that the number of  
 267 significant genes has not yet plateaued. Increasing sample sizes should result in the discovery  
 268 of many novel DD-associated genes. To estimate how many haploinsufficient genes might await  
 269 discovery, we modelled the likelihood of the observed distribution of protein-truncating DNMs  
 270 among genes as a function of varying numbers of undiscovered HI DD genes and fold-

271 enrichments of protein-truncating DNMs in those genes. We found that the remaining HI burden  
272 is most likely spread across ~500 genes with ~12-fold PTV enrichment (**Fig. 4b**). This fold  
273 enrichment is three times lower than in known HI DD-associated genes, suggesting that  
274 incomplete penetrance and/or pre/perinatal death is much more prevalent among undiscovered  
275 HI genes. We modelled the missense DNM burden separately and also observed that the most  
276 likely architecture of undiscovered DD-associated genes is one that comprises over 500 genes  
277 with a substantially lower fold-enrichment than in currently known DD-associated genes  
278 (**Supplemental Fig. 12**).

279 We calculated that a sample size of ~200,000 parent-offspring trios would be needed to  
280 have 80% power to detect a 12-fold enrichment of protein-truncating DNMs for a gene with the  
281 median PTV mutation rate among currently unassociated genes. Using this inferred 12-fold  
282 enrichment among undiscovered HI genes, from our current data we can evaluate the likelihood  
283 that any gene in the genome is an undiscovered HI gene, by comparing the likelihood of the  
284 number of *de novo* PTVs observed in each gene to have arisen from the null mutation rate or  
285 from a 12-fold increased PTV rate. Among the ~19,000 non-DD-associated genes, ~1,100 were  
286 more than three times more likely to have arisen from a 12-fold increased PTV rate, whereas  
287 ~9,000 were three times more likely to have no *de novo* PTV enrichment.

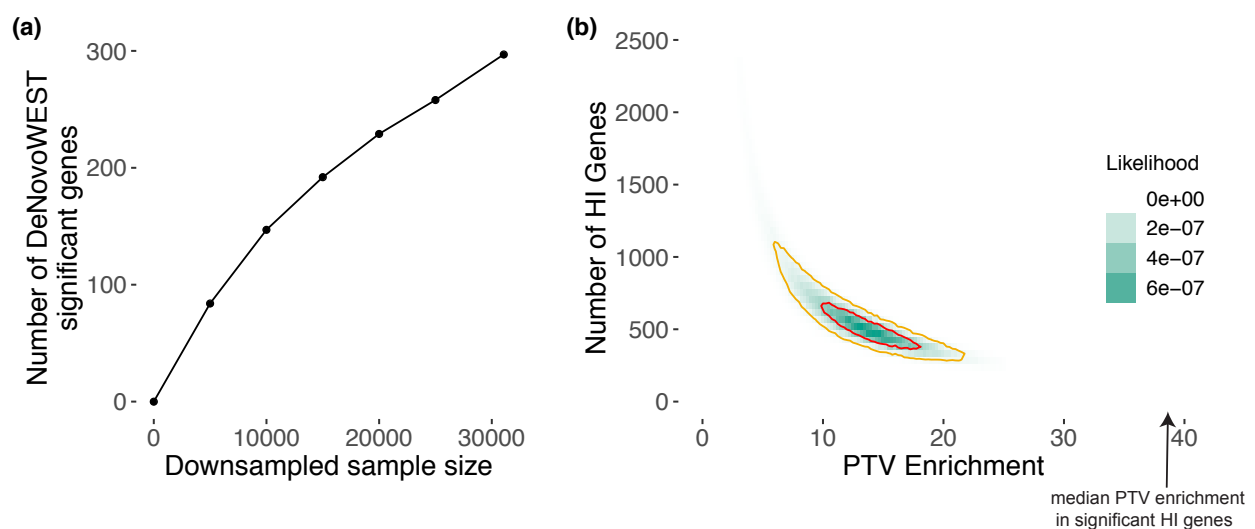

288 **Figure 4: Exploring the remaining number of DD genes.** (a) Number of significant genes  
289 from downsampling full cohort and running DeNovoWEST's enrichment test. (b) Results from  
290 modelling the likelihood of the observed distribution of *de novo* PTV mutations. This model  
291 varies the numbers of remaining haploinsufficient (HI) DD genes and PTV enrichment in those  
292 remaining genes. The 50% credible interval is shown in red and the 90% credible interval is  
293 shown in orange. Note that the median PTV enrichment in significant HI genes (shown with an  
294 arrow) is 38.8.  
295

## 296 Discussion

297 In this study, we have discovered 49 novel developmental disorders by developing an  
298 improved statistical test for mutation enrichment and applying it to a dataset of exome  
299 sequences from 31,058 children with developmental disorders, and their parents. These 49  
300 novel genes account for up to 1.6% of our cohort, and inclusion of these genes in diagnostic  
301 workflows will catalyse increased diagnosis of similar patients globally. We have shown that  
302 both incomplete penetrance and pre/perinatal death reduce our power to detect novel DDs  
303 postnatally, and that one or both of these factors are likely operating considerably more strongly  
304 among undiscovered DD-associated genes. In addition, we have identified a set of highly  
305 recurrent mutations that are strong candidates for novel germline selection mutations, which  
306 would be expected to result in a higher than expected disease incidence that increases  
307 dramatically with increased paternal age.

308 Our study represents the largest collection of DNMs for any disease area, and is  
309 approximately three times larger than a recent meta-analysis of DNMs from a collection of  
310 individuals with autism spectrum disorder, intellectual disability, and/or a developmental  
311 disorder<sup>34</sup>. Our analysis included DNMs from 24,348 previously unpublished trios, and we  
312 identified ~2.4 times as many significantly DD-associated genes as this previous study when  
313 using Bonferroni-corrected exome-wide significance (299 vs 124). In contrast to meta-analyses  
314 of published DNMs, the harmonised filtering of candidate DNMs across cohorts in this study  
315 should protect against results being confounded by substantial cohort-specific differences in the  
316 sensitivity and specificity of detecting DNMs.

317 Here we inferred indirectly that developmental disorders with higher rates of detectable  
318 prenatal structural abnormalities had greater pre/perinatal death. The potential size of this effect  
319 can be quantified from the recently published PAGE study of genetic diagnoses in a cohort of  
320 fetal structural abnormalities<sup>35</sup>. In this latter study, genetic diagnoses were not returned to  
321 participants during the pregnancy, and so the genetic diagnostic information itself could not  
322 influence pre/perinatal death. In the PAGE study data, 69% of fetal abnormalities with a  
323 genetically diagnosable cause died perinatally or neonatally, with termination of pregnancy, fetal  
324 demise and neonatal death all contributing. This emphasises the substantial impact that  
325 pre/perinatal death can have on reducing the ability to discover novel DDs from postnatal  
326 recruitment alone, and motivates the integration of genetic data from prenatal, neonatal and  
327 postnatal studies in future analyses.

328 To empower our mutation enrichment testing, we estimated positive predictive values  
329 (PPV) of each DNM being pathogenic on the basis of their predicted protein consequence,  
330 CADD score<sup>3</sup> and presence in a region or gene under missense constraint in the general  
331 population<sup>4</sup>. These PPVs should also be highly informative for variant prioritisation in the  
332 diagnosis of dominant developmental disorders. Further work is needed to see whether these

333 PPVs might be informative for recessive developmental disorders, and in other types of  
334 dominant disorders. More generally, we hypothesise that empirically-estimated PPVs based on  
335 variant enrichment in large datasets will be similarly informative in many other disease areas.

336 We adopted a conservative statistical approach to identifying DD-associated genes. In  
337 two previous studies using the same significance threshold, we identified 26 novel DD-  
338 associated genes<sup>1,36</sup>. All 26 are now regarded as being diagnostic, and have entered routine  
339 clinical diagnostic practice. Had we used a significance threshold of FDR < 10% as used in  
340 Satterstrom, Kosmicki, Wang et al<sup>37</sup>, we would have identified 737 DD-associated genes.  
341 However, as the FDR of individual genes depends on the significance of other genes being  
342 tested, FDR thresholds are not appropriate for assessing the significance of individual genes,  
343 but rather for defining gene-sets. There are 150 consensus genes that did not cross our  
344 significance threshold in this study. It is likely that many of these cause disorders that were  
345 under-represented in our study due to the ease of clinical diagnosis on the basis of distinctive  
346 clinical features or targeted diagnostic testing. These ascertainment biases are, however, not  
347 likely to impact the representation of novel DDs in our cohort.

348 Our modelling also suggested that likely over 1,000 DD-associated genes remain to be  
349 discovered, and that reduced penetrance and pre/perinatal death will reduce our power to  
350 identify these genes through DNM enrichment. Identifying these genes will require both  
351 improved analytical methods and greater sample sizes. We anticipate that the variant-level and  
352 gene-level weights used by DeNovoWEST will improve over time. As reference population  
353 samples, such as gnomAD<sup>5</sup>, increase in size, gene-level weights based on selective constraint  
354 metrics will improve. Gene-level weights could also incorporate more functional information,  
355 such as expression in disease-relevant tissues. For example, we observe that our DD-  
356 associated genes are significantly more likely to be expressed in fetal brain (**Supplementary**  
357 **Fig. 13**). Furthermore, novel metrics based on gene co-regulation networks can predict whether  
358 genes function within a disease relevant pathway<sup>38</sup>. As a cautionary note, including more  
359 functional information in the gene-level weights may increase power to detect some novel  
360 disorders while decreasing power for disorders with pathophysiology different from known  
361 disorders. Variant-level weights could be further improved by incorporating other variant  
362 prioritisation metrics, such as upweighting variants predicted to impact splicing, variants in  
363 particular protein domains, or variants that are somatic driver mutations during tumorigenesis.  
364 Finally, the discovery of less penetrant disorders can be empowered by analytical  
365 methodologies that integrate both DNMs and rare inherited variants, such as TADA<sup>39</sup>.  
366 Nonetheless, using current methods, we estimated that ~200,000 parent-child trios would need  
367 to be analysed to have ~80% power to detect HI genes with a 12-fold PTV enrichment.  
368 Discovering non-HI disorders will need even larger sample sizes. Reaching this number of  
369 sequenced families will be impossible for an individual research study or clinical centre,



370 therefore it is essential that genetic data generated as part of routine diagnostic practice is  
371 shared with the research community such that it can be aggregated to drive discovery of novel  
372 disorders and improve diagnostic practice.

373

#### 374 **Acknowledgements**

375 We thank the families and their clinicians for their participation and engagement. We are very  
376 grateful to our colleagues who assisted in the generation and processing of data. Inclusion of  
377 RadboudUMC data was in part supported by the Solve-RD project that has received funding  
378 from the European Union's Horizon 2020 research and innovation programme under grant  
379 agreement No 779257. The DDD study presents independent research commissioned by the  
380 Health Innovation Challenge Fund [grant number HICF-1009-003]. This study makes use of  
381 DECIPHER which is funded by Wellcome. See [www.ddduk.org/access.html](http://www.ddduk.org/access.html) for full  
382 acknowledgement. The DDD study would like to acknowledge the tireless work of Rosemary  
383 Kelsell. Finally we acknowledge the contribution of an esteemed DDD clinical collaborator, M.  
384 Bitner-Glindicz, who died during the course of the study.

385

#### 386 **Data Access**

387 Sequence and variant level data and phenotypic data for the DDD study data are available  
388 through EGA study ID EGAS00001000775  
389 RadboudUMC sequence and variant level data cannot be made available through EGA due to  
390 the nature of consent for clinical testing  
391 GeneDx data cannot be made available through EGA due to the nature of consent for clinical  
392 testing. GeneDx has contributed deidentified data to this study to improve clinical interpretation  
393 of genomic data, in accordance with patient consent and in conformance with the ACMG  
394 position statement on genomic data sharing (see Supplementary Note for details).  
395 Clinically interpreted variants and associated phenotypes from the DDD study are available  
396 through DECIPHER (<https://decipher.sanger.ac.uk>)  
397 Clinically interpreted variants from RUMC are available from the Dutch national initiative for  
398 sharing variant classifications (<https://www.vkgl.nl/nl/diagnostiek/vkgl-datashare-database>)  
399 Clinically interpreted variants from GeneDx are deposited in ClinVar  
400 (<https://www.ncbi.nlm.nih.gov/clinvar>)

401



## References

1. Deciphering Developmental Disorders Study. Prevalence and architecture of de novo mutations in developmental disorders. *Nature* **542**, 433–438 (2017).
2. Martin, H. C. *et al.* Quantifying the contribution of recessive coding variation to developmental disorders. *Science* **362**, 1161–1164 (2018).
3. Kircher, M. *et al.* A general framework for estimating the relative pathogenicity of human genetic variants. *Nat. Genet.* **46**, 310–315 (2014).
4. Samocha, K. E. *et al.* Regional missense constraint improves variant deleteriousness prediction. *bioRxiv* 148353 (2017). doi:10.1101/148353
5. Karczewski, K. J. *et al.* Variation across 141,456 human exomes and genomes reveals the spectrum of loss-of-function intolerance across human protein-coding genes. *bioRxiv* 531210 (2019). doi:10.1101/531210
6. Kosmicki, J. A. *et al.* Refining the role of de novo protein-truncating variants in neurodevelopmental disorders by using population reference samples. *Nat. Genet.* **49**, 504–510 (2017).
7. Lek, M. *et al.* Analysis of protein-coding genetic variation in 60,706 humans. *Nature* **536**, 285–291 (2016).
8. Cooper, G. M. *et al.* A copy number variation morbidity map of developmental delay. *Nat. Genet.* **43**, 838–846 (2011).
9. Coe, B. P. *et al.* Refining analyses of copy number variation identifies specific genes associated with developmental delay. *Nat. Genet.* **46**, 1063–1071 (2014).
10. Ignatiadis, N., Klaus, B., Zaugg, J. B. & Huber, W. Data-driven hypothesis weighting increases detection power in genome-scale multiple testing. *Nat. Methods* **13**, 577–580 (2016).
11. Cassa, C. A. *et al.* Estimating the selective effects of heterozygous protein-truncating variants from human exome data. *Nat. Genet.* **49**, 806–810 (2017).
12. Robinson, J. T. *et al.* Integrative genomics viewer. *Nature Biotechnology* **29**, 24–26 (2011).

13. Reynhout, S. *et al.* De Novo Mutations Affecting the Catalytic C $\alpha$  Subunit of PP2A, PPP2CA, Cause Syndromic Intellectual Disability Resembling Other PP2A-Related Neurodevelopmental Disorders. *Am. J. Hum. Genet.* **104**, 139–156 (2019).
14. Carapito, R. *et al.* ZMIZ1 Variants Cause a Syndromic Neurodevelopmental Disorder. *Am. J. Hum. Genet.* **104**, 319–330 (2019).
15. Calpena, E. *et al.* De Novo Missense Substitutions in the Gene Encoding CDK8, a Regulator of the Mediator Complex, Cause a Syndromic Developmental Disorder. *Am. J. Hum. Genet.* **104**, 709–720 (2019).
16. Salpietro, V. *et al.* Mutations in the Neuronal Vesicular SNARE VAMP2 Affect Synaptic Membrane Fusion and Impair Human Neurodevelopment. *Am. J. Hum. Genet.* **104**, 721–730 (2019).
17. O'Donnell-Luria, A. H. *et al.* Heterozygous Variants in KMT2E Cause a Spectrum of Neurodevelopmental Disorders and Epilepsy. *Am. J. Hum. Genet.* **104**, 1210–1222 (2019).
18. Stolerman, E. S. *et al.* Genetic variants in the KDM6B gene are associated with neurodevelopmental delays and dysmorphic features. *Am. J. Med. Genet. A* **179**, 1276–1286 (2019).
19. Dulovic-Mahlow, M. *et al.* De Novo Variants in TAOK1 Cause Neurodevelopmental Disorders. *Am. J. Hum. Genet.* (2019). doi:10.1016/j.ajhg.2019.05.005
20. Jaganathan, K. *et al.* Predicting Splicing from Primary Sequence with Deep Learning. *Cell* **176**, 535–548.e24 (2019).
21. Yilmaz, R. *et al.* A recurrent synonymous KAT6B mutation causes Say-Barber-Biesecker/Young-Simpson syndrome by inducing aberrant splicing. *Am. J. Med. Genet. A* **167A**, 3006–3010 (2015).
22. Wu, X., Pang, E., Lin, K. & Pei, Z.-M. Improving the measurement of semantic similarity between gene ontology terms and gene products: insights from an edge- and IC-based hybrid method. *PLoS One* **8**, e66745 (2013).
23. Coban-Akdemir, Z. *et al.* Identifying Genes Whose Mutant Transcripts Cause Dominant Disease Traits by Potential Gain-of-Function Alleles. *Am. J. Hum. Genet.* **103**, 171–187

- (2018).
24. Catterall, W. A., Dib-Hajj, S., Meisler, M. H. & Pietrobon, D. Inherited neuronal ion channelopathies: new windows on complex neurological diseases. *J. Neurosci.* **28**, 11768–11777 (2008).
  25. Martincorena, I. *et al.* Universal Patterns of Selection in Cancer and Somatic Tissues. *Cell* **173**, 1823 (2018).
  26. Qi, H., Dong, C., Chung, W. K., Wang, K. & Shen, Y. Deep Genetic Connection Between Cancer and Developmental Disorders. *Hum. Mutat.* **37**, 1042–1050 (2016).
  27. Ronan, J. L., Wu, W. & Crabtree, G. R. From neural development to cognition: unexpected roles for chromatin. *Nat. Rev. Genet.* **14**, 347–359 (2013).
  28. Cancer Genome Atlas Research Network *et al.* The Cancer Genome Atlas Pan-Cancer analysis project. *Nat. Genet.* **45**, 1113–1120 (2013).
  29. Goriely, A. & Wilkie, A. O. M. Paternal age effect mutations and selfish spermatogonial selection: causes and consequences for human disease. *Am. J. Hum. Genet.* **90**, 175–200 (2012).
  30. Duncan, B. K. & Miller, J. H. Mutagenic deamination of cytosine residues in DNA. *Nature* **287**, 560–561 (1980).
  31. Maher, G. J. *et al.* Visualizing the origins of selfish de novo mutations in individual seminiferous tubules of human testes. *Proc. Natl. Acad. Sci. U. S. A.* **113**, 2454–2459 (2016).
  32. Maher, G. J. *et al.* Selfish mutations dysregulating RAS-MAPK signaling are pervasive in aged human testes. *Genome Res.* **28**, 1779–1790 (2018).
  33. Young, L. C. *et al.* SHOC2-MRAS-PP1 complex positively regulates RAF activity and contributes to Noonan syndrome pathogenesis. *Proc. Natl. Acad. Sci. U. S. A.* **115**, E10576–E10585 (2018).
  34. Coe, B. P. *et al.* Neurodevelopmental disease genes implicated by de novo mutation and copy number variation morbidity. *Nat. Genet.* **51**, 106–116 (2019).
  35. Lord, J. *et al.* Prenatal exome sequencing analysis in fetal structural anomalies detected by

- ultrasonography (PAGE): a cohort study. *Lancet* **393**, 747–757 (2019).
36. Deciphering Developmental Disorders Study. Large-scale discovery of novel genetic causes of developmental disorders. *Nature* **519**, 223–228 (2015).
  37. Kyle Satterstrom, F. *et al.* Large-scale exome sequencing study implicates both developmental and functional changes in the neurobiology of autism. *bioRxiv* 484113 (2019). doi:10.1101/484113
  38. Deelen, P. *et al.* Improving the diagnostic yield of exome-sequencing by predicting gene-phenotype associations using large-scale gene expression analysis. *Nat. Commun.* **10**, 2837 (2019).
  39. He, X. *et al.* Integrated model of de novo and inherited genetic variants yields greater power to identify risk genes. *PLoS Genet.* **9**, e1003671 (2013).
